# Supplementary material for: The 2-oxoglutarate-dependent dioxygenase superfamily participates in tanshinone production in Salvia miltiorrhiza
Source: PubMed Central journal article supplement (PMC5447875; doi:10.1093/jxb/erx113), 2017-04-08
Supplement: erx113_suppl_supplementary_figures_S1_S5_Tables_S1_S6.pdf [file erx113_suppl_supplementary_figures_S1_S5_Tables_S1_S6.pdf]

## Supplementary data

### **The 2-oxoglutarate-dependent dioxygenase superfamily participates in tanshinone production of *Salvia miltiorrhiza***

Zhichao Xu<sup>1</sup>, Jingyuan Song<sup>1\*</sup>

<sup>1</sup>Institute of Medicinal Plant Development, Chinese Academy of Medical Sciences & Peking Union Medical College, Key Laboratory of Bioactive Substances and Resources Utilization of Chinese Herbal Medicine, Ministry of Education, Beijing, China.

Fig. S1. Phylogenetic tree of 2OGD genes from *S. miltiorrhiza*, *A. thaliana*, and *O. sativa*.

Fig. S2. Gene structure analysis of 2OGD genes in *S. miltiorrhiza*.

Fig. S3. Conserved motif analysis of 2OGD genes in *S. miltiorrhiza*.

Fig. S4. Ten conserved motif sequences of 2OGD genes in *S. miltiorrhiza*.

Fig. S5. Gene ontology (GO) annotation analysis of 2OGD genes in *S. miltiorrhiza*.

Table S1. The primers used for qPCR analysis, full-length cloning, and gateway clones of RNAi vectors.

Table S2. The predicted cellular localization of 2OGD superfamily members in *S. miltiorrhiza*.

Table S3. The identification of homologous 2OGD members between *S. miltiorrhiza*, *A. thaliana*, and *O. sativa*.

Table S4. The gene expression of 2OGDs in different organs, tissues, and following MeJA treatment.

Table S5. Candidate 2OGDs related to tanshinone biosynthesis in *S. miltiorrhiza*.

Table S6. Different tanshinone metabolites analysed from 2OGD5-silencing lines and control lines.



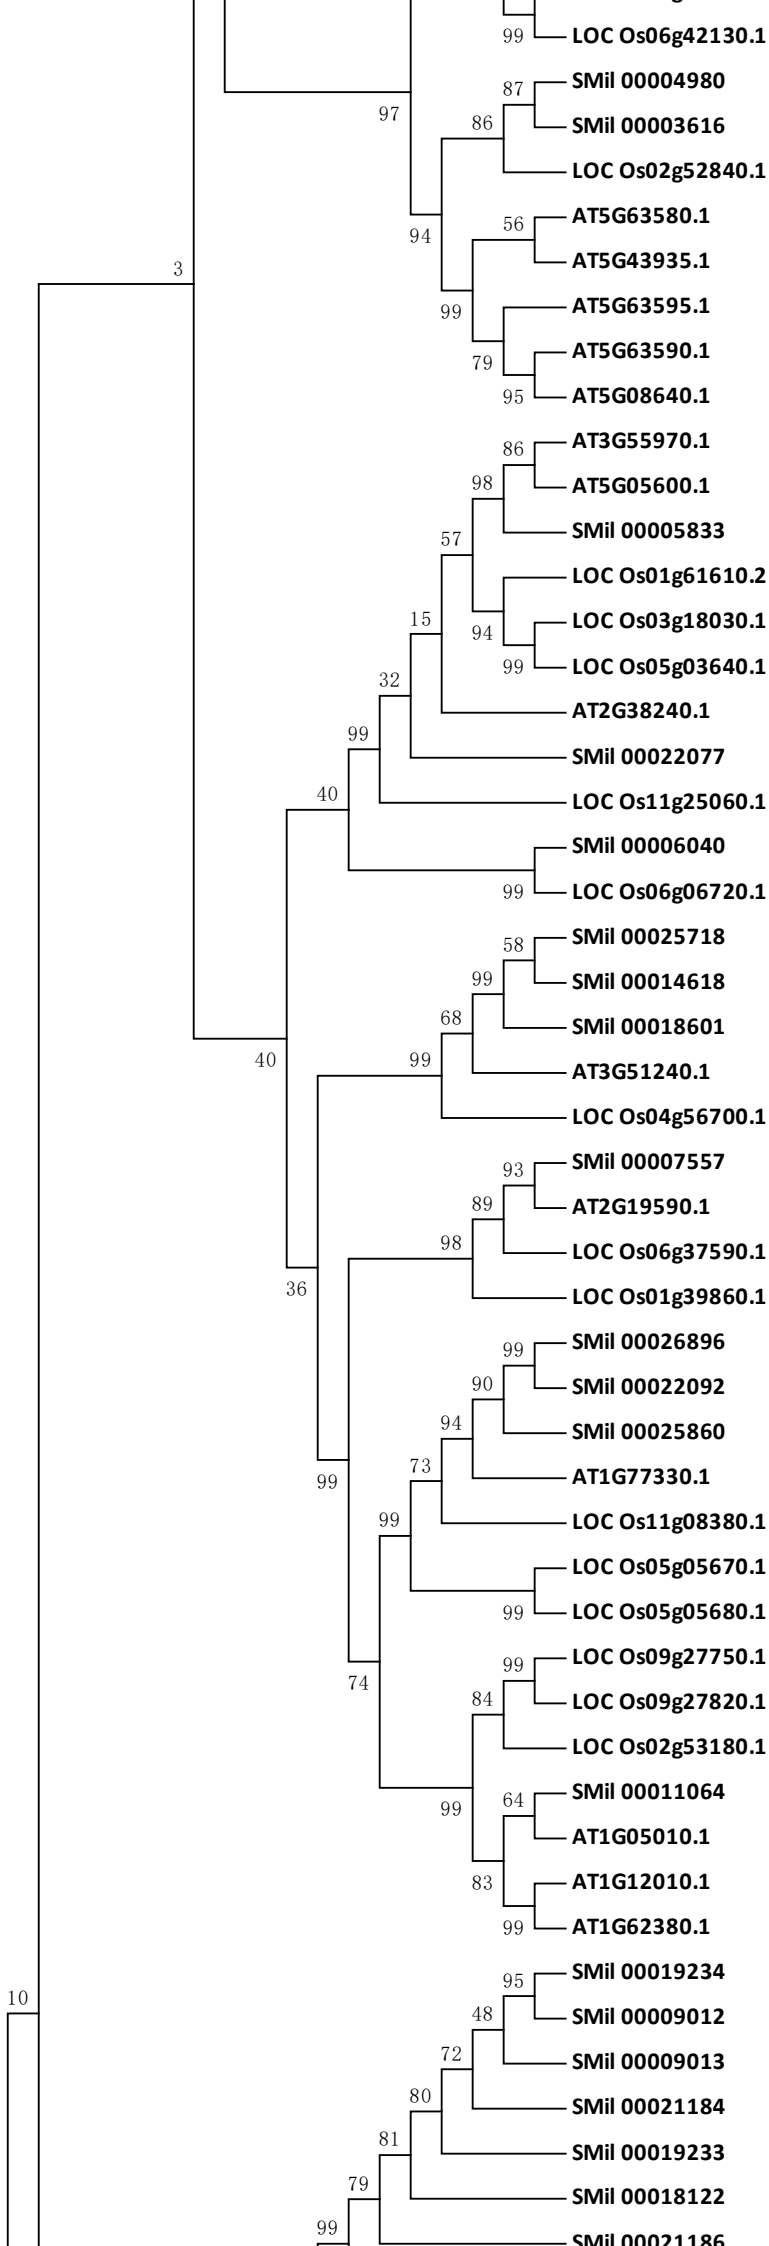

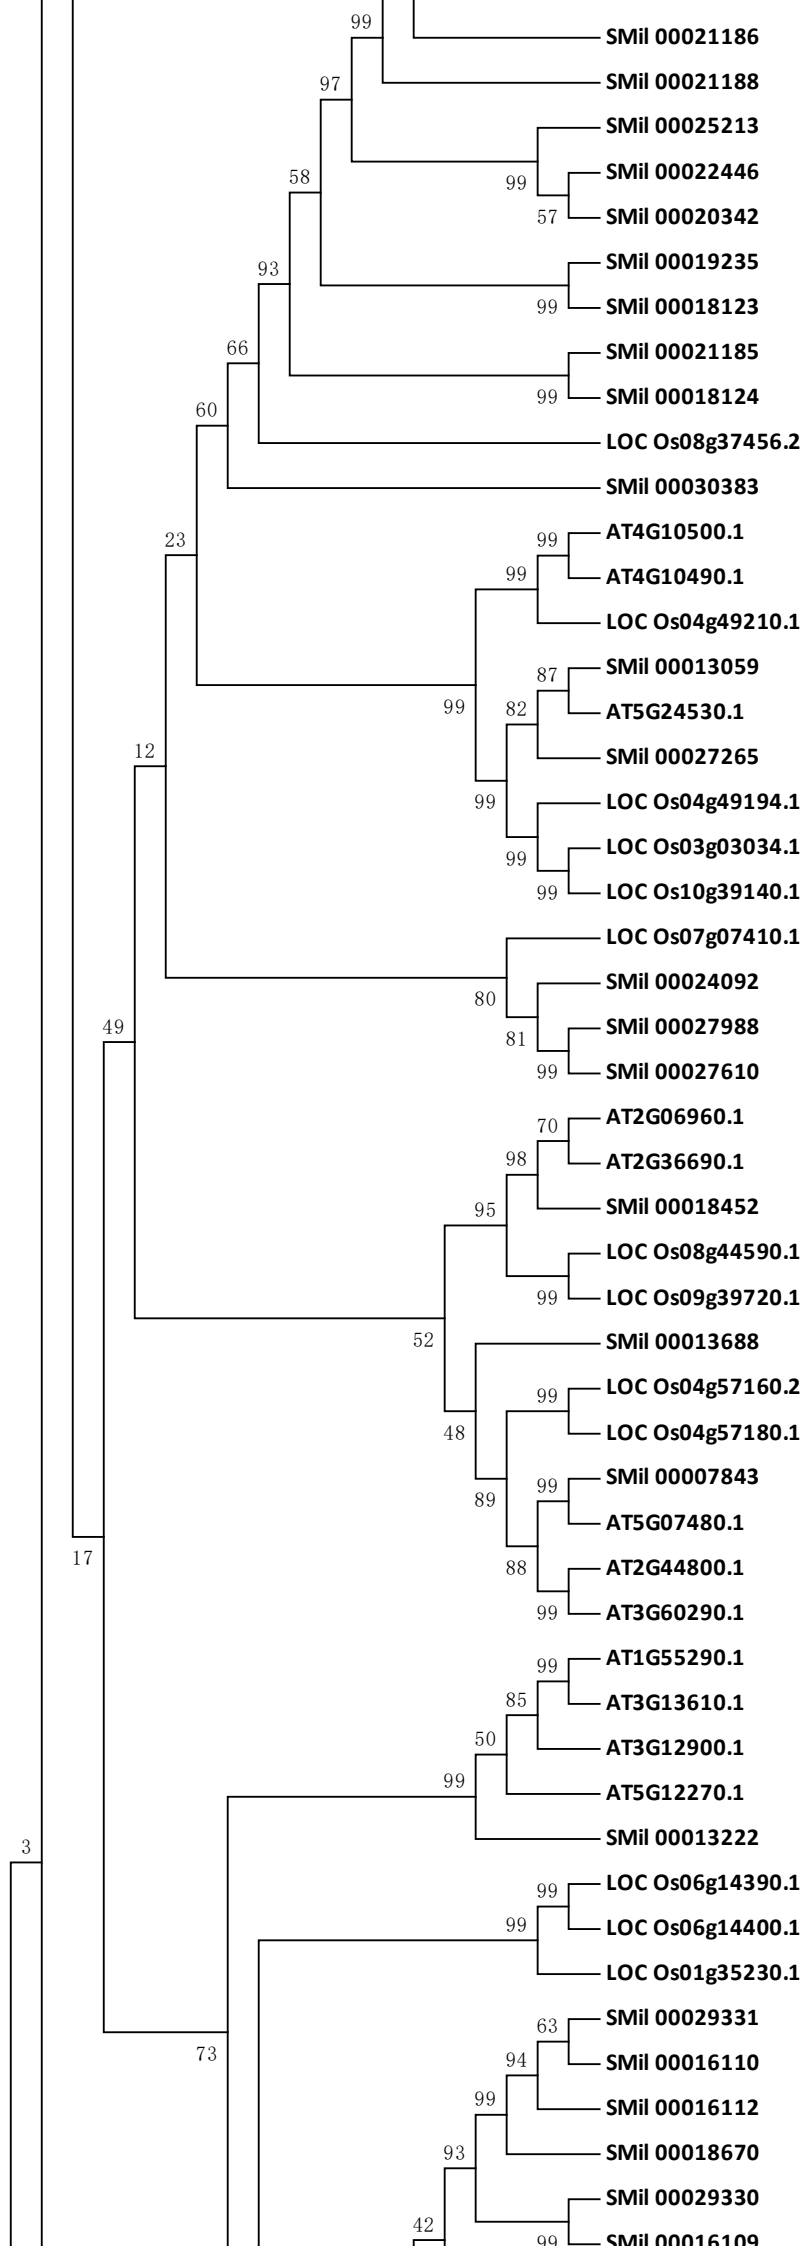

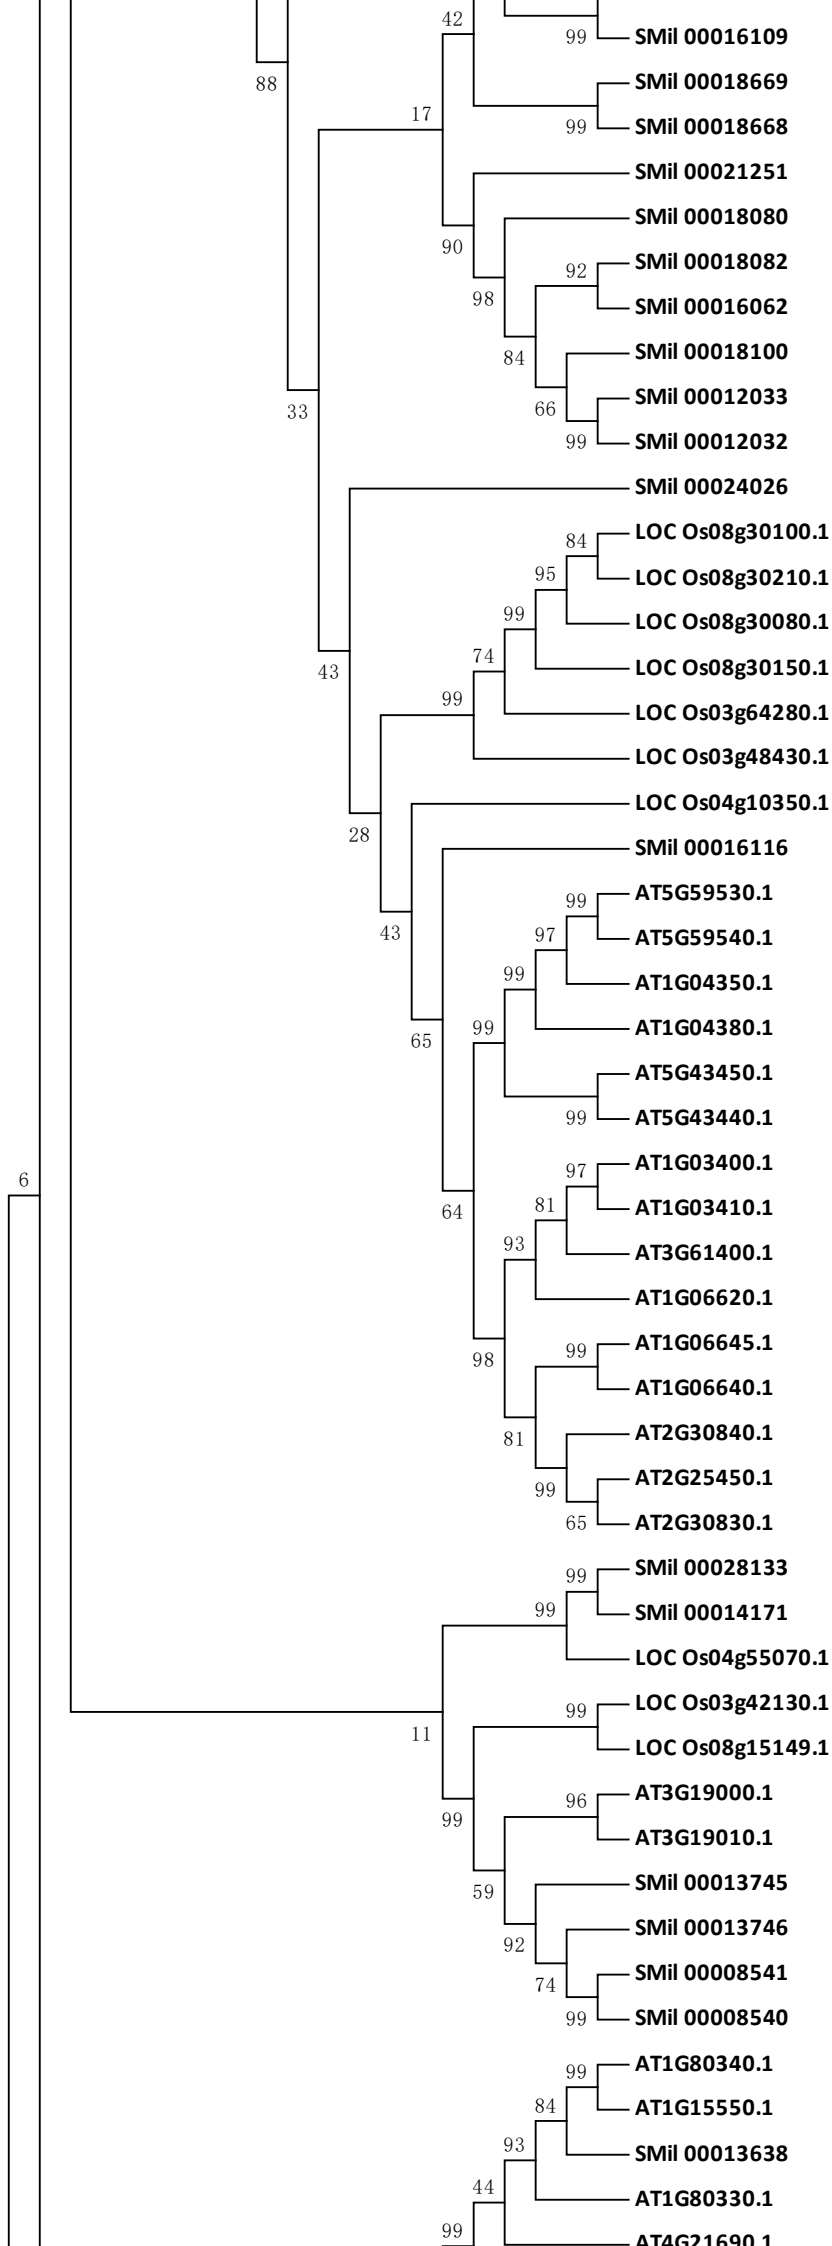

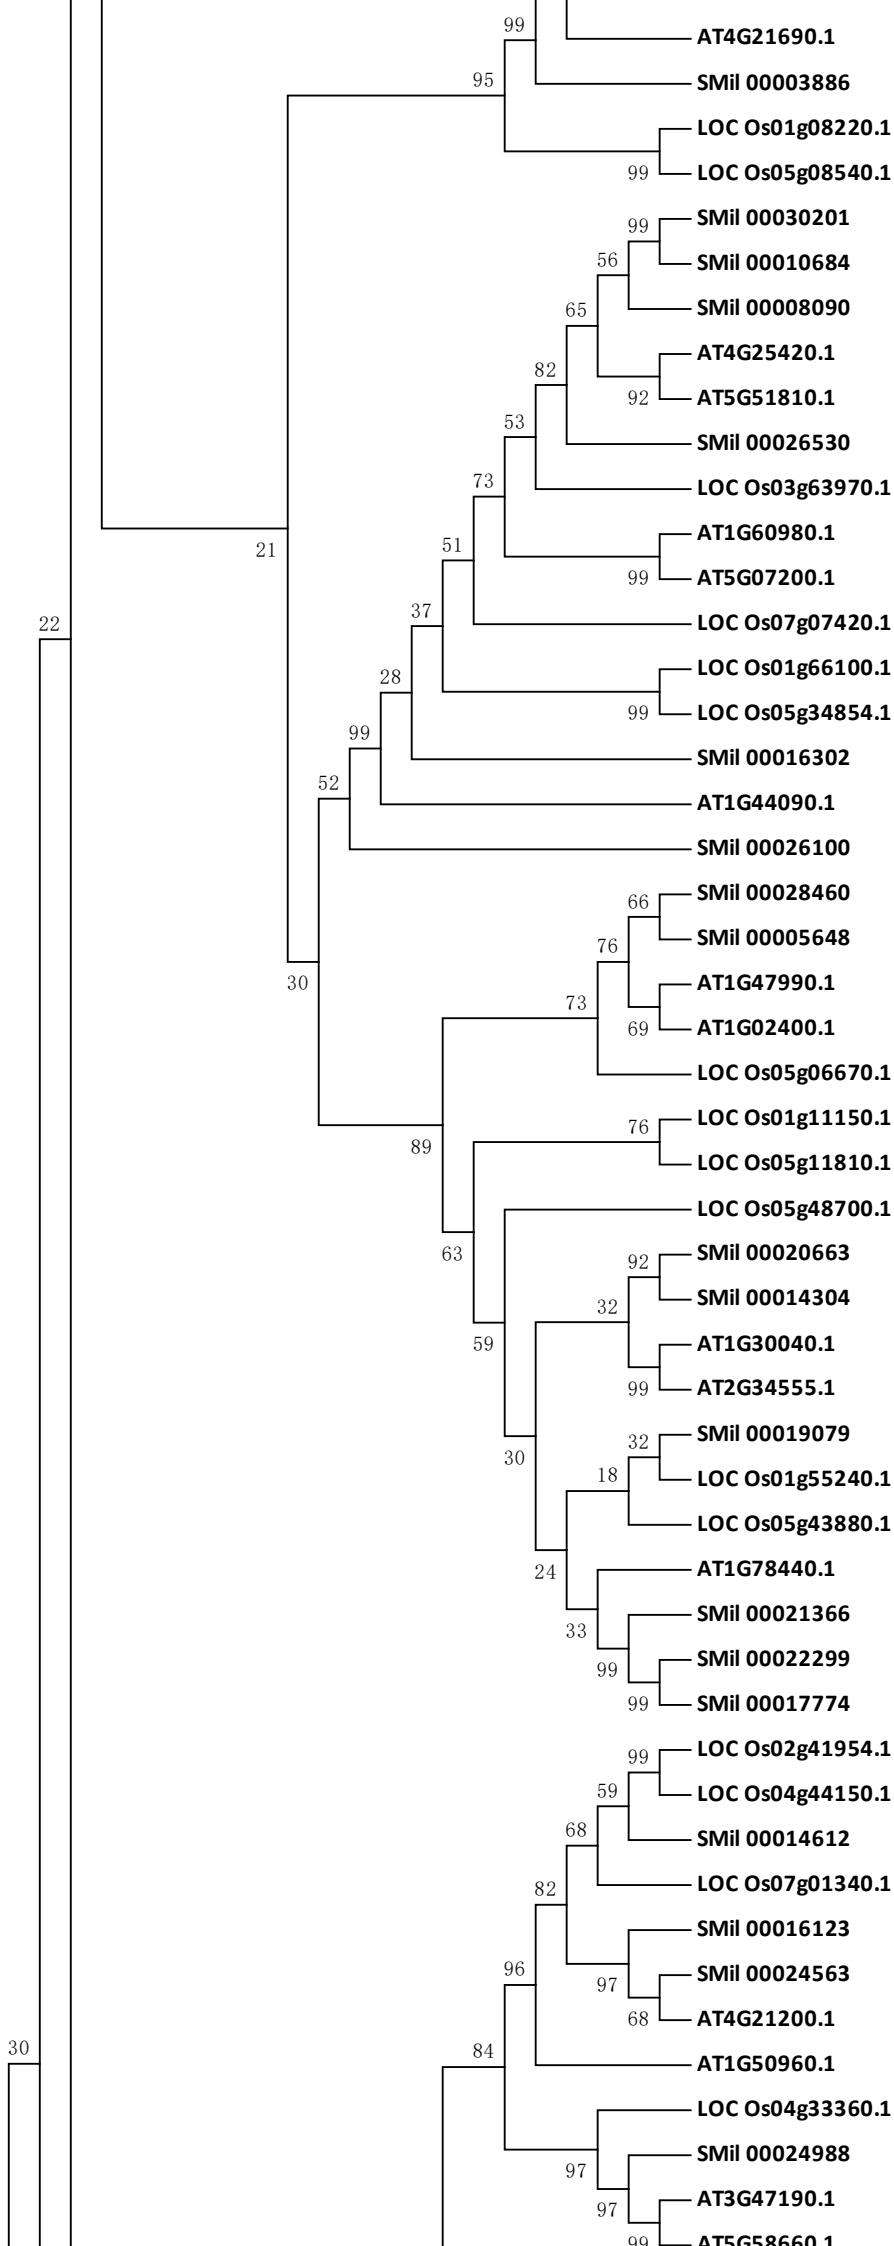

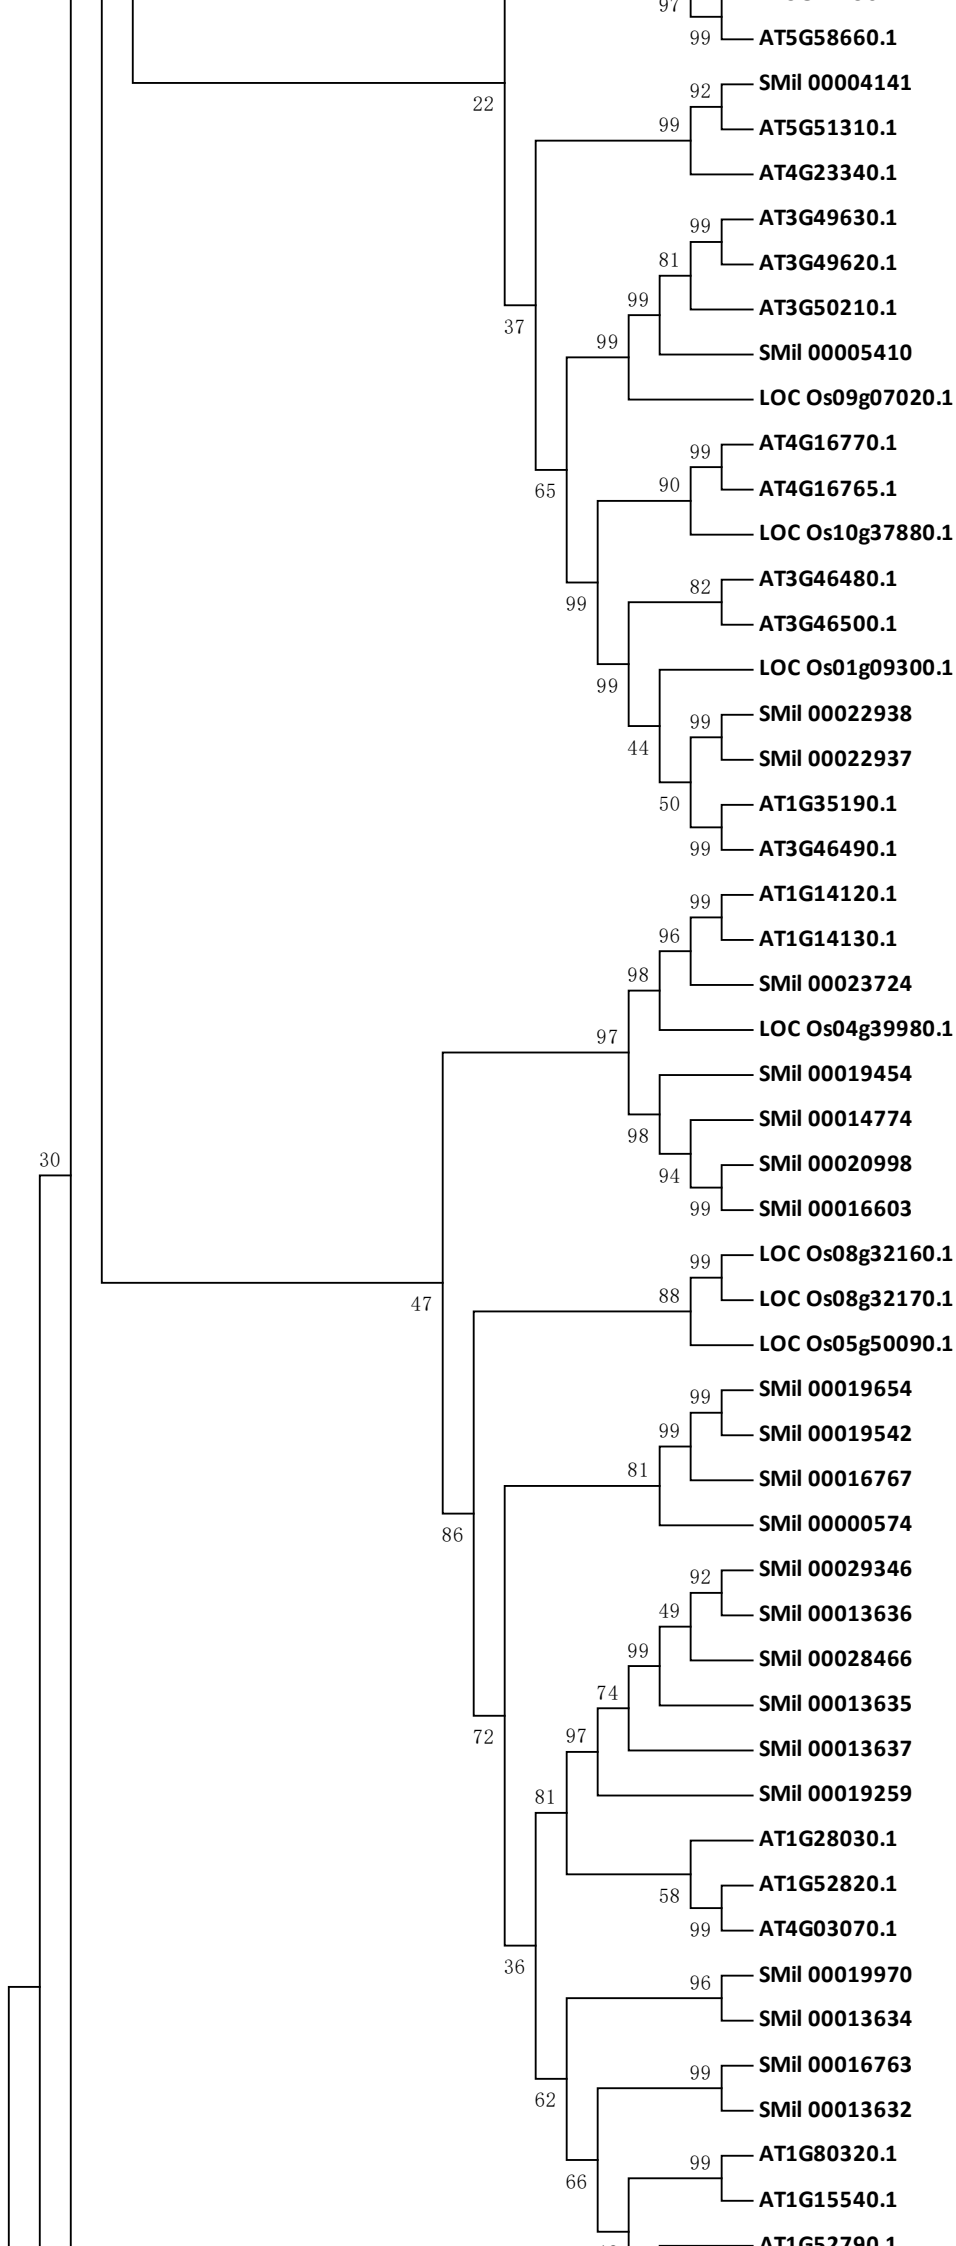



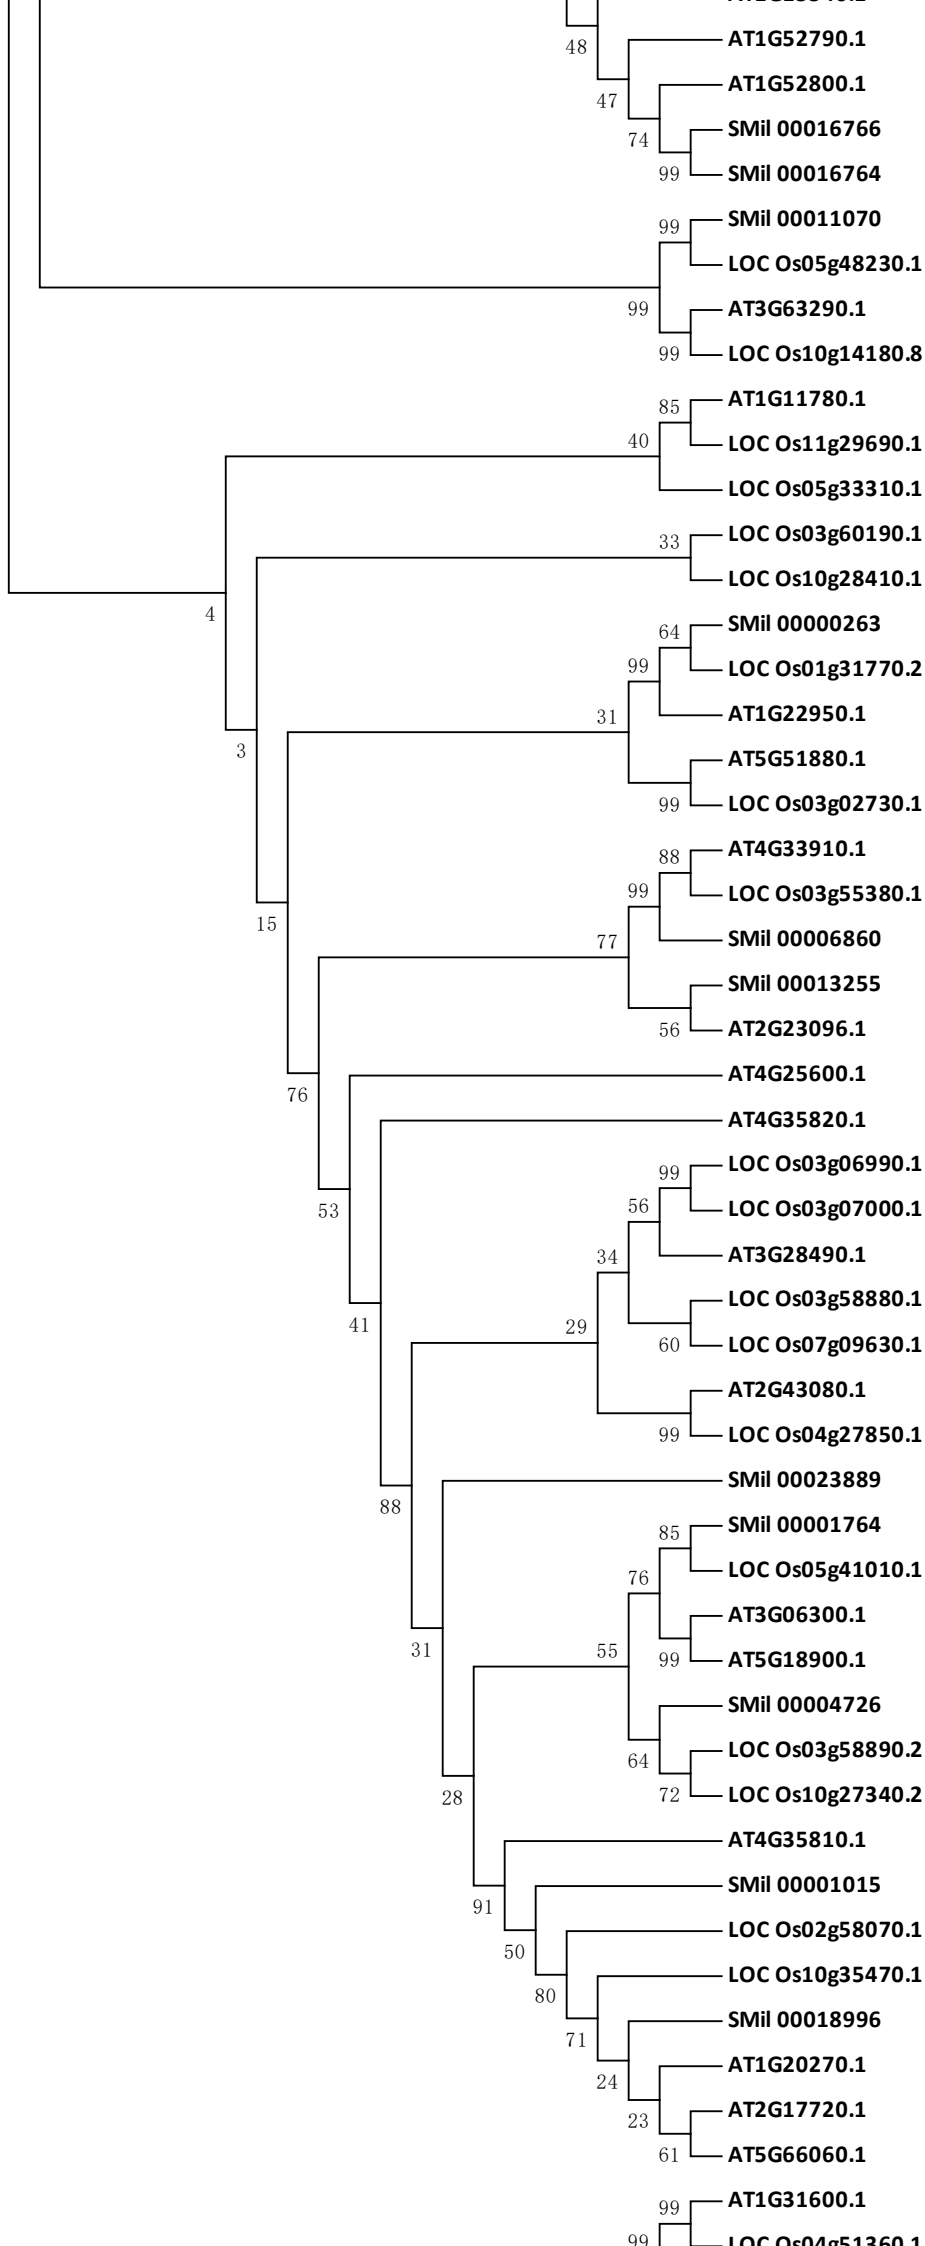

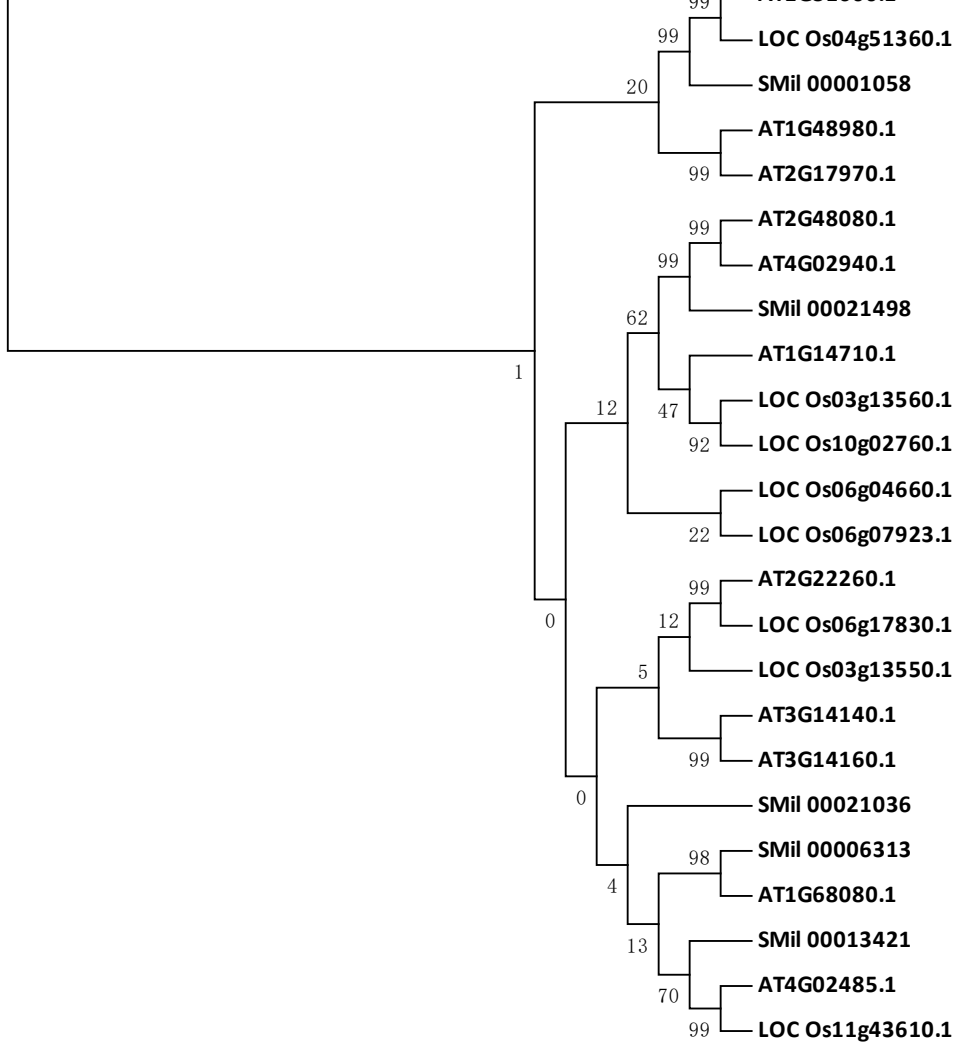

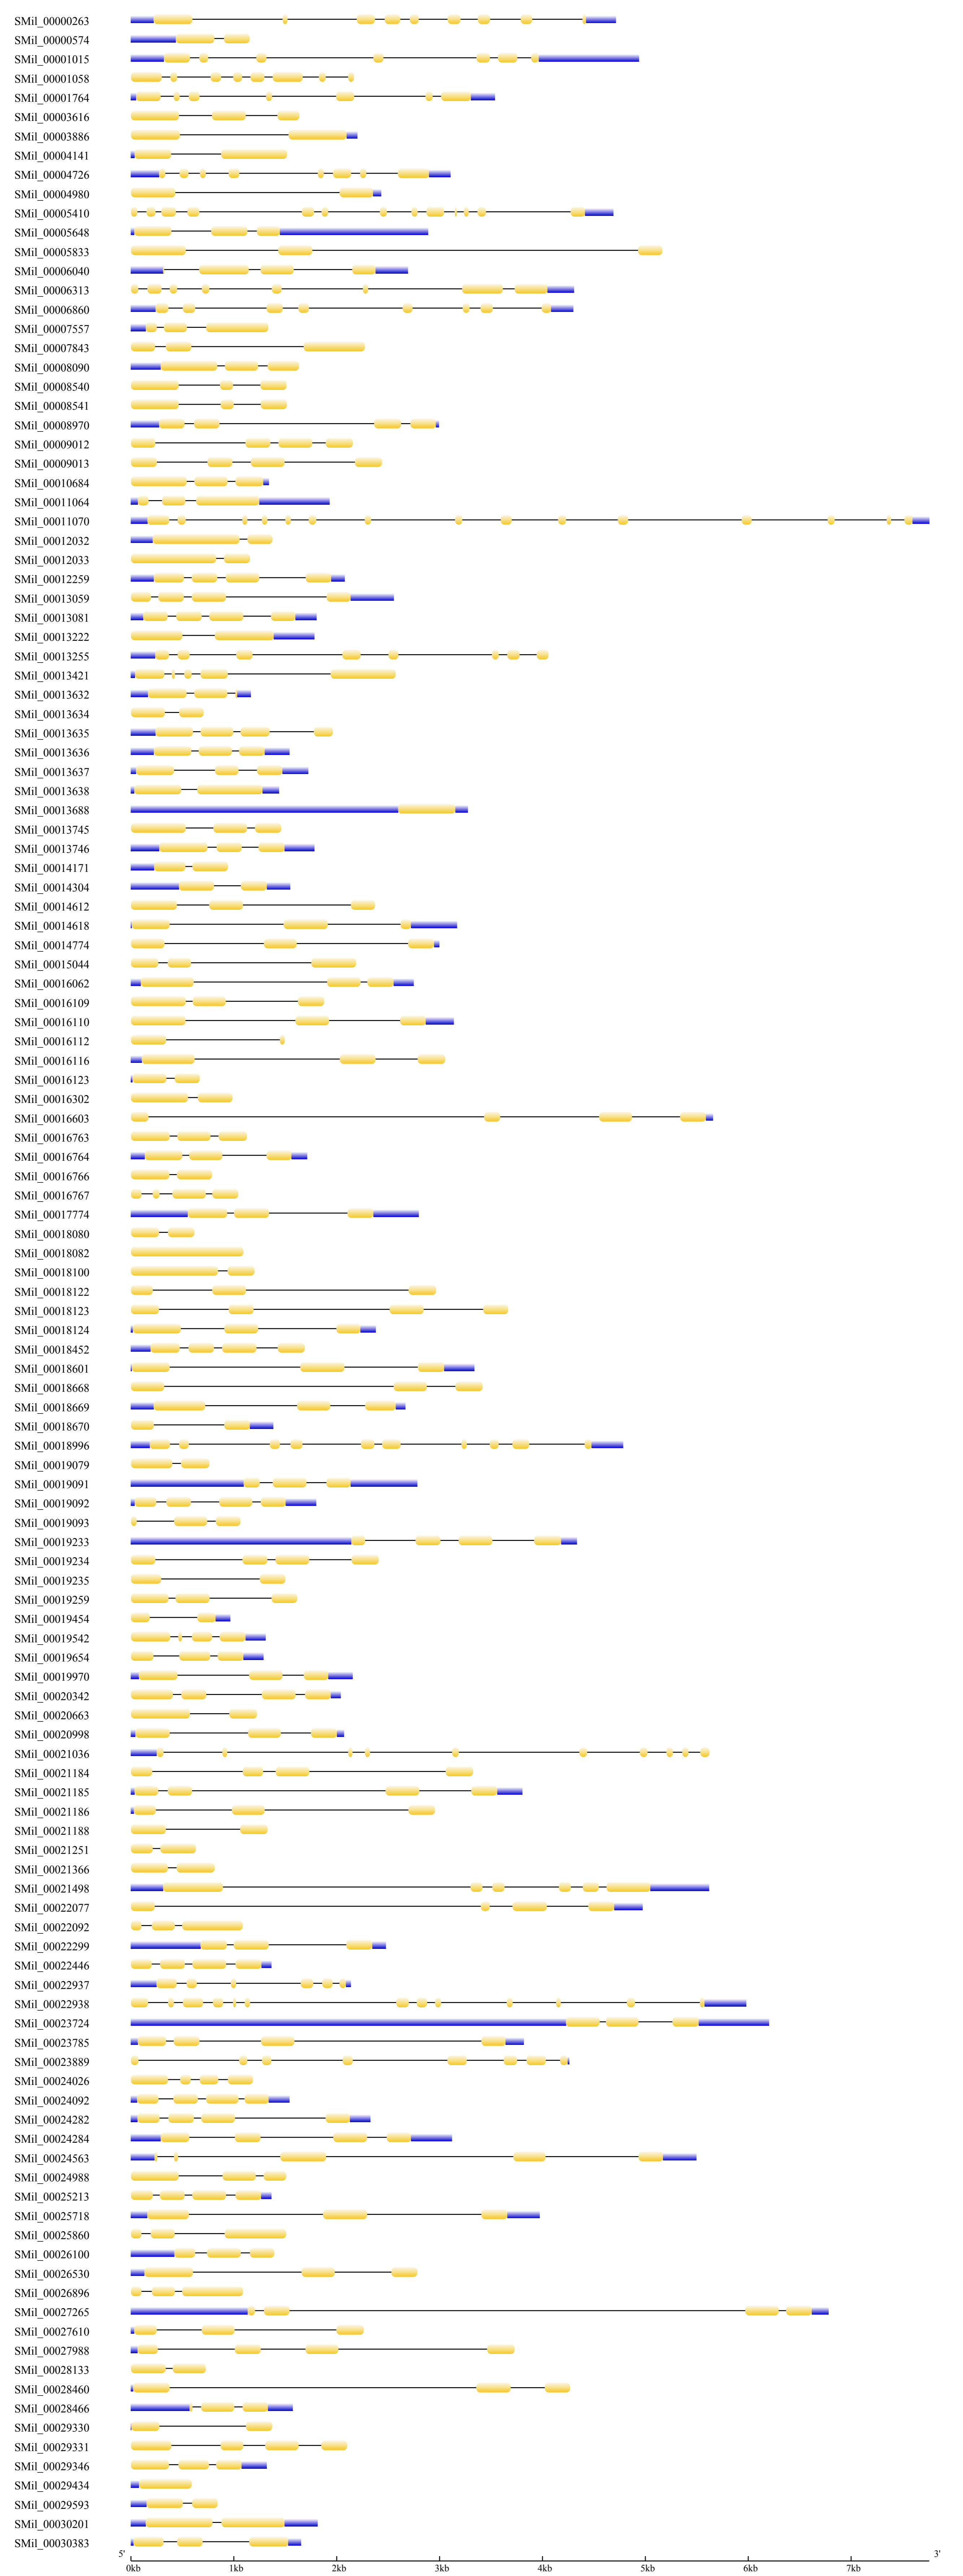

Legend:  
█ CDS    █ upstream/ downstream    — Intron

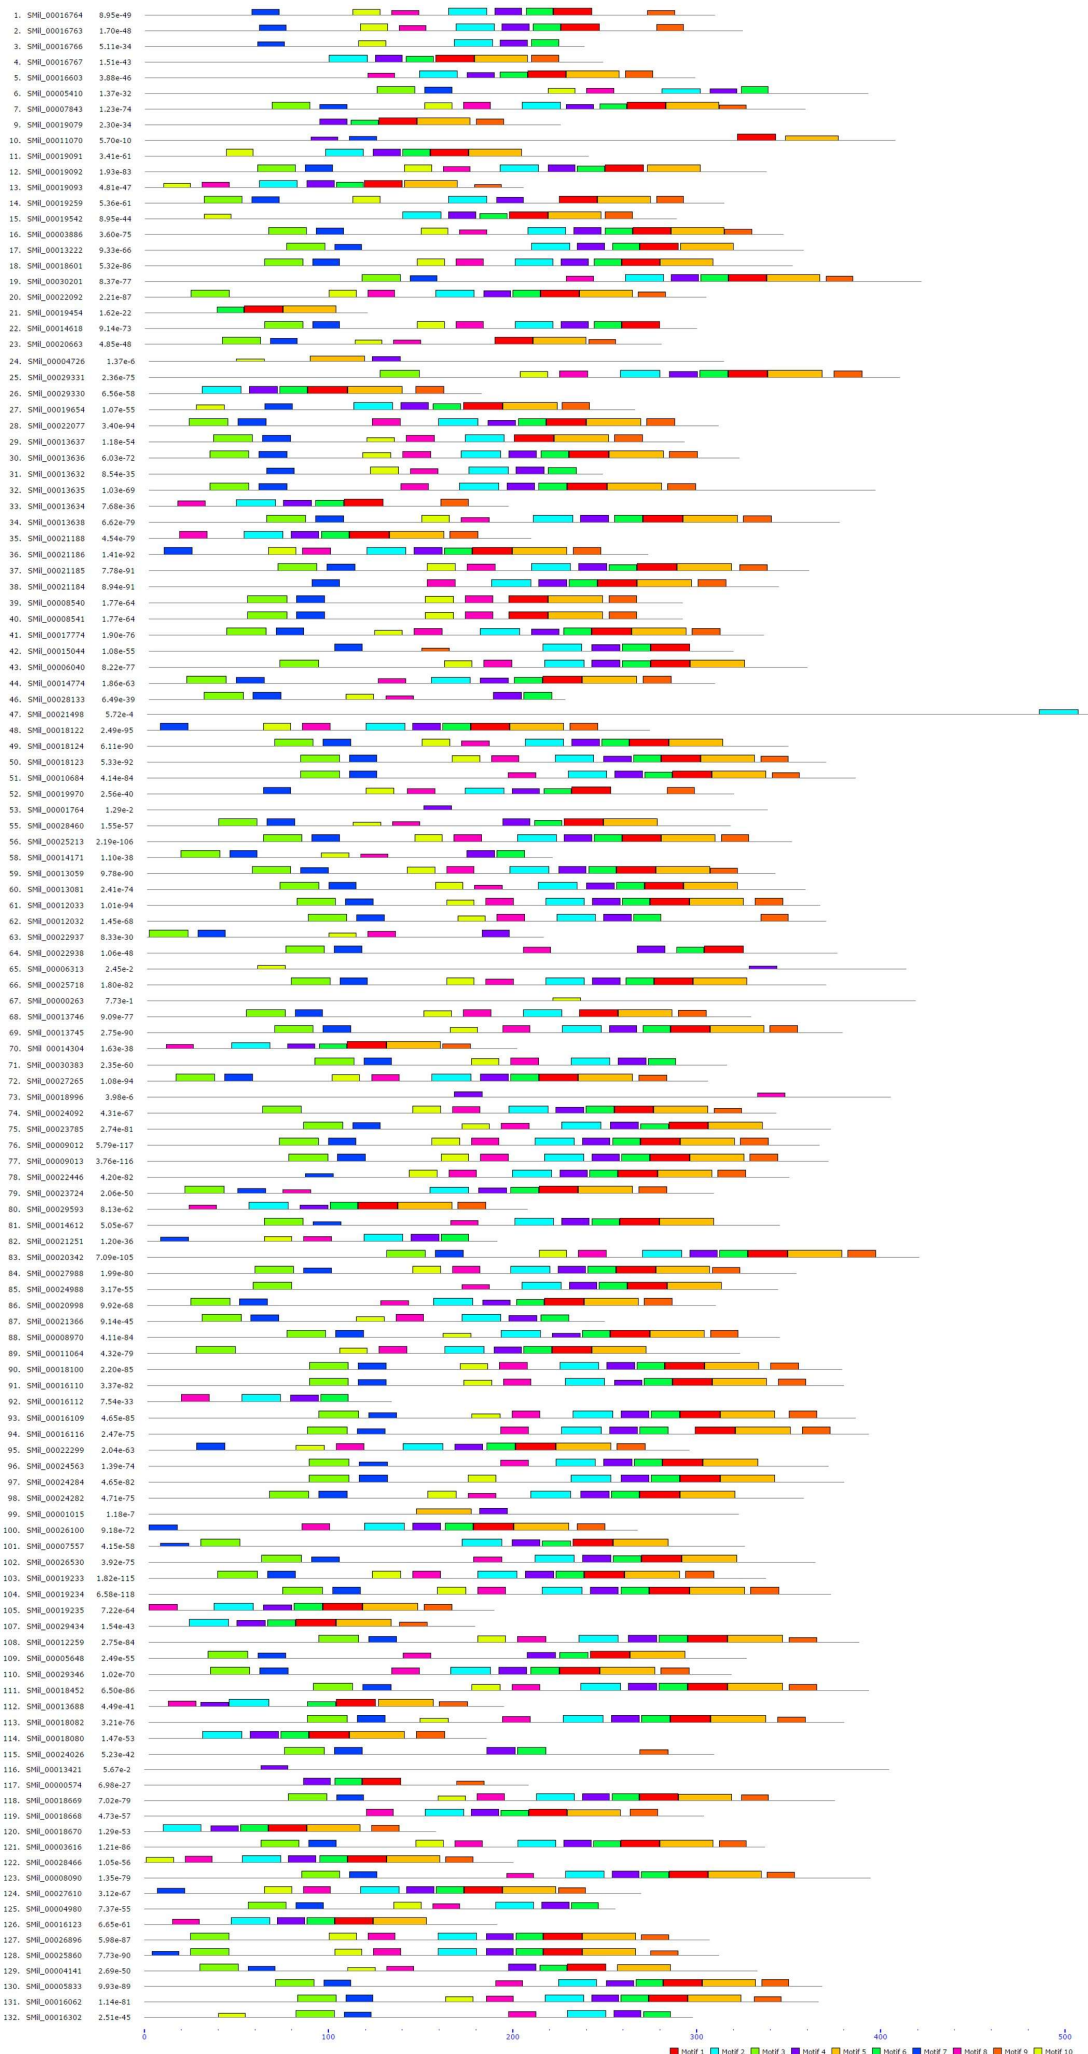

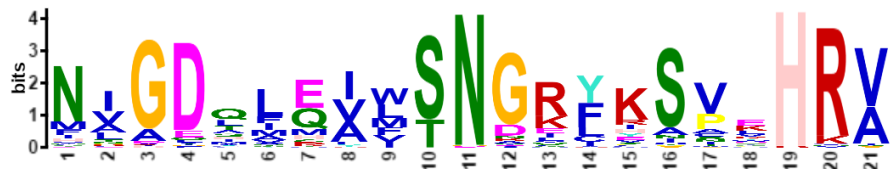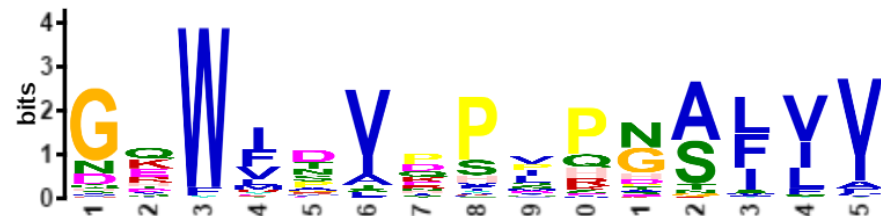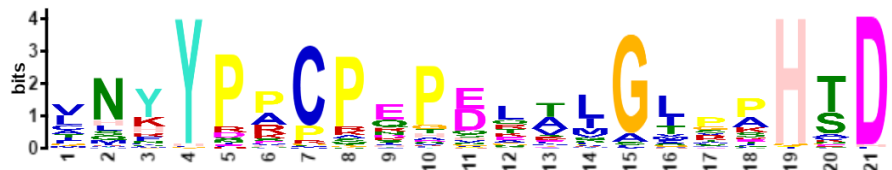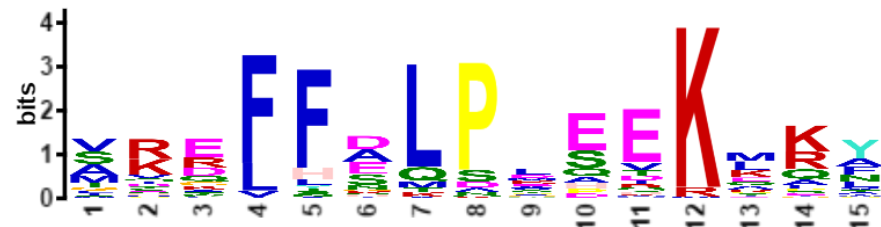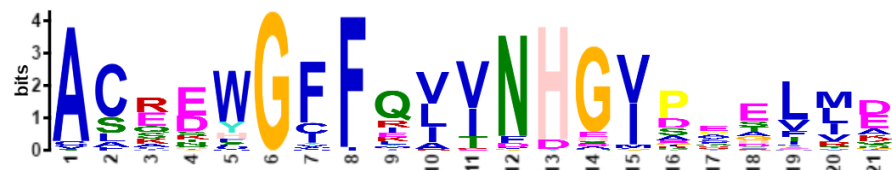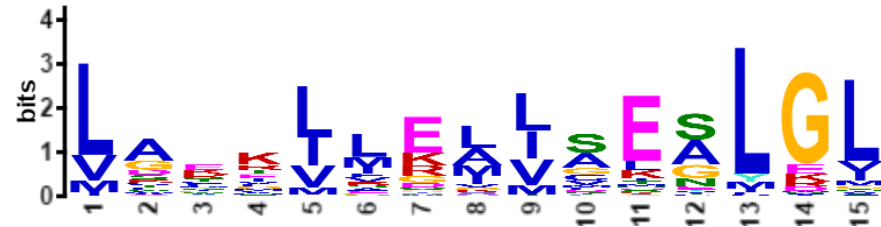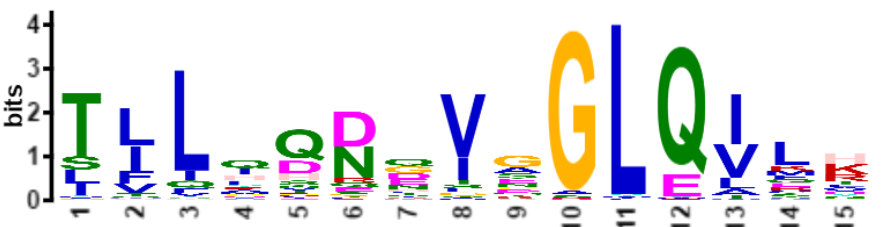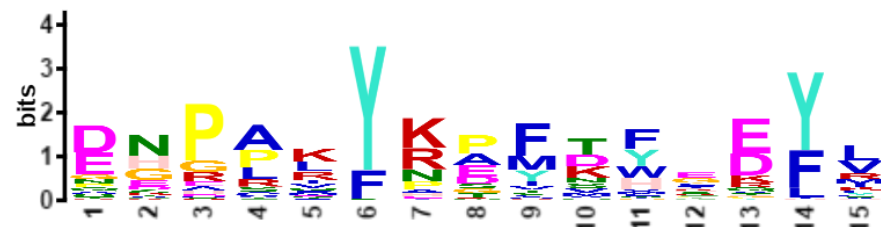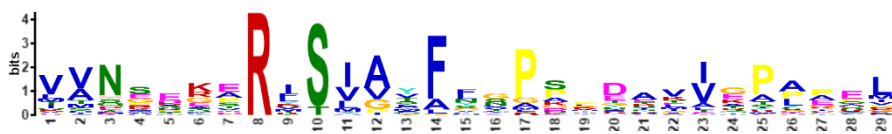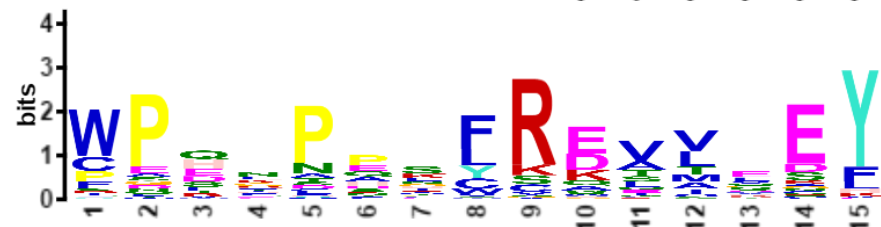

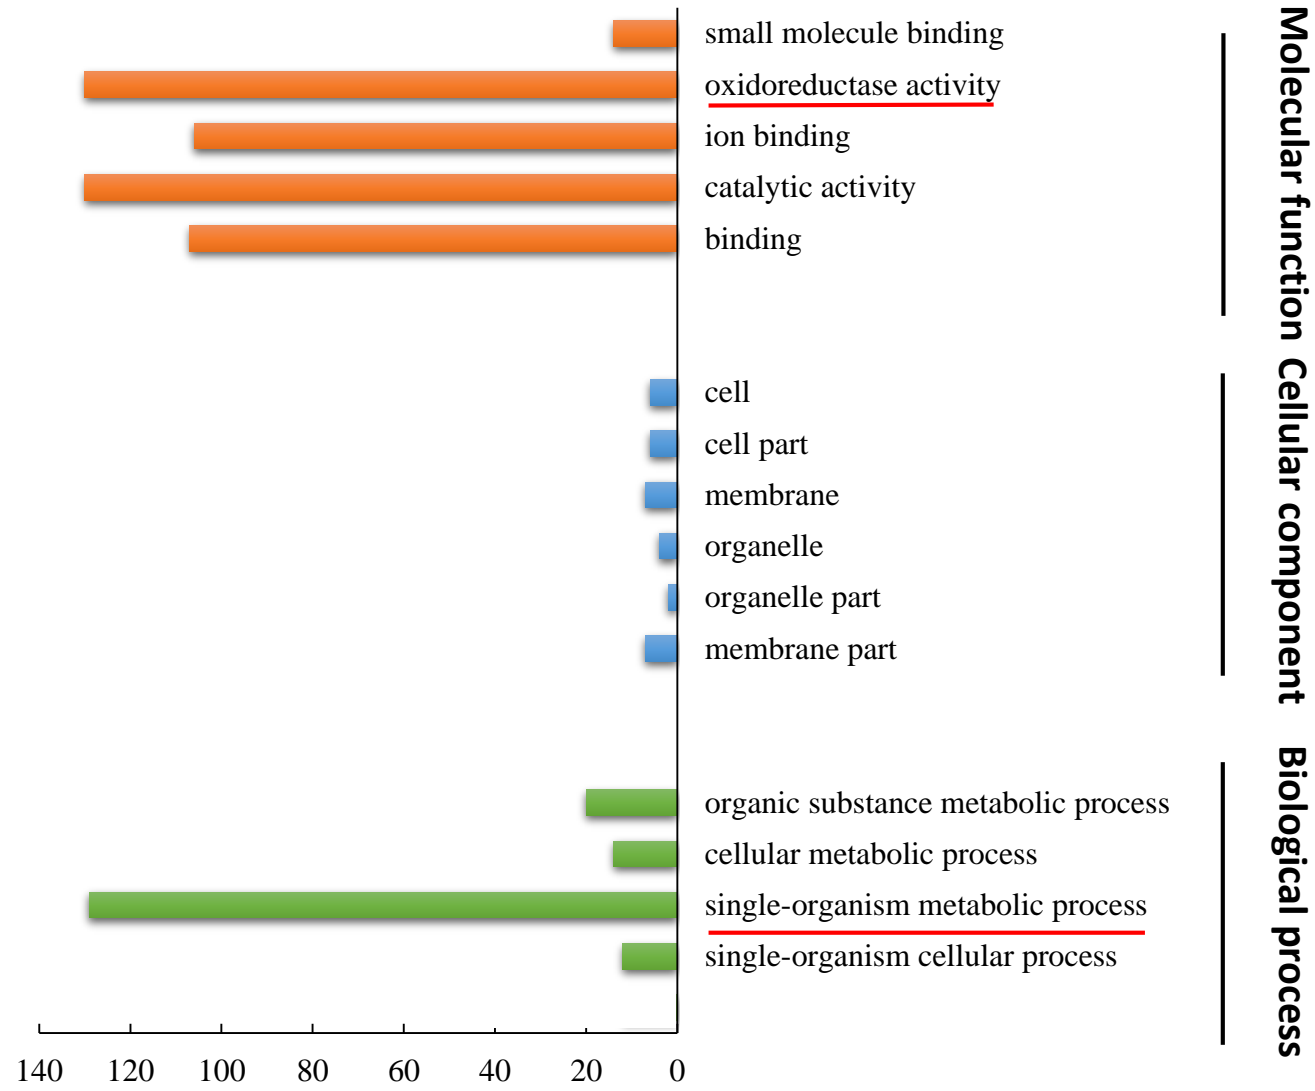

Supplementary Table1. The primers used for qPCR analysis, cloning full-length, and gateway clone of RNAi vectors.

| <b>Gene_name</b> | <b>Use</b>  | <b>Primer pairs (5'-3' Forward/Reverse)</b>                                                           |
|------------------|-------------|-------------------------------------------------------------------------------------------------------|
| 2OGD-5           | qPCR        | CGTGTCTCTATTACCCAGTCTG/CATTGACCGCCGTGAAGAA                                                            |
| SmActin          | qPCR        | AGGAACCACCGATCCAGACA/GGTGCCCTGAGGTCCTGTT                                                              |
| 2OGD-5           | Full-length | ATGGTGCTCTCTAGCAACGGTG/TCAAATCTTGTAATGAGGCAAAGCCG                                                     |
| 2OGD-5           | RNAi        | GGGGACAAGTTTGTACAAAAAAGCAGGCTCCCTCGGAGACGATGGACG/<br>GGGGACCACTTTGTACAAGAAAGCTGGGTGTCGTCGCTGAAGACGCAC |
| PK-GFP           | RNAi        | CTCGTTGGGGTCTTTGCTC/ CACAAGTTCAGCGTGTCCG                                                              |

Supplementary Table 2 The cellular localization prediction of 2OGD superfamily members in *S. multiorrhiza*.

| Name          | Len | cTP   | mTP   | SP    | other | Loc | RC |
|---------------|-----|-------|-------|-------|-------|-----|----|
| SMil_00030383 | 307 | 0.075 | 0.084 | 0.070 | 0.946 | _   | 1  |
| SMil_00030201 | 421 | 0.416 | 0.228 | 0.041 | 0.210 | *   | 5  |
| SMil_00029593 | 201 | 0.137 | 0.060 | 0.206 | 0.848 | _   | 2  |
| SMil_00029434 | 170 | 0.100 | 0.070 | 0.088 | 0.887 | _   | 2  |
| SMil_00029346 | 304 | 0.267 | 0.074 | 0.161 | 0.749 | _   | 3  |
| SMil_00029331 | 396 | 0.118 | 0.095 | 0.065 | 0.863 | _   | 2  |
| SMil_00029330 | 175 | 0.084 | 0.343 | 0.115 | 0.597 | _   | 4  |
| SMil_00028466 | 199 | 0.267 | 0.081 | 0.103 | 0.755 | _   | 3  |
| SMil_00028460 | 311 | 0.089 | 0.091 | 0.134 | 0.908 | _   | 2  |
| SMil_00028133 | 220 | 0.044 | 0.084 | 0.066 | 0.978 | _   | 1  |
| SMil_00027988 | 344 | 0.162 | 0.087 | 0.042 | 0.850 | _   | 2  |
| SMil_00027610 | 268 | 0.071 | 0.097 | 0.139 | 0.893 | _   | 2  |
| SMil_00027265 | 297 | 0.056 | 0.183 | 0.152 | 0.712 | _   | 3  |
| SMil_00026896 | 305 | 0.098 | 0.101 | 0.142 | 0.856 | _   | 2  |
| SMil_00026530 | 348 | 0.230 | 0.071 | 0.075 | 0.723 | _   | 3  |
| SMil_00026100 | 255 | 0.067 | 0.549 | 0.008 | 0.669 | _   | 5  |
| SMil_00025860 | 310 | 0.116 | 0.075 | 0.153 | 0.758 | _   | 2  |
| SMil_00025718 | 362 | 0.069 | 0.022 | 0.793 | 0.402 | S   | 4  |
| SMil_00025213 | 344 | 0.837 | 0.031 | 0.065 | 0.136 | C   | 2  |
| SMil_00024988 | 334 | 0.785 | 0.034 | 0.082 | 0.272 | C   | 3  |
| SMil_00024563 | 355 | 0.051 | 0.119 | 0.224 | 0.616 | _   | 4  |
| SMil_00024284 | 363 | 0.177 | 0.069 | 0.277 | 0.635 | _   | 4  |
| SMil_00024282 | 342 | 0.210 | 0.052 | 0.163 | 0.553 | _   | 4  |
| SMil_00024092 | 333 | 0.491 | 0.052 | 0.076 | 0.718 | _   | 4  |
| SMil_00024026 | 295 | 0.115 | 0.124 | 0.093 | 0.896 | _   | 2  |
| SMil_00023889 | 306 | 0.295 | 0.051 | 0.162 | 0.688 | _   | 4  |
| SMil_00023785 | 362 | 0.013 | 0.016 | 0.898 | 0.541 | S   | 4  |
| SMil_00023724 | 300 | 0.018 | 0.018 | 0.897 | 0.250 | S   | 2  |
| SMil_00022938 | 368 | 0.086 | 0.050 | 0.021 | 0.879 | _   | 2  |
| SMil_00022937 | 211 | 0.138 | 0.083 | 0.294 | 0.685 | _   | 4  |
| SMil_00022446 | 340 | 0.780 | 0.024 | 0.078 | 0.145 | C   | 2  |
| SMil_00022299 | 282 | 0.052 | 0.905 | 0.026 | 0.275 | M   | 2  |
| SMil_00022092 | 304 | 0.108 | 0.100 | 0.134 | 0.854 | _   | 2  |
| SMil_00022077 | 300 | 0.064 | 0.605 | 0.014 | 0.546 | *   | 5  |
| SMil_00021498 | 504 | 0.006 | 0.602 | 0.110 | 0.114 | *   | 3  |
| SMil_00021366 | 242 | 0.068 | 0.055 | 0.508 | 0.611 | _   | 5  |
| SMil_00021251 | 185 | 0.050 | 0.483 | 0.049 | 0.781 | _   | 4  |
| SMil_00021188 | 201 | 0.027 | 0.132 | 0.436 | 0.343 | S   | 5  |
| SMil_00021186 | 263 | 0.174 | 0.072 | 0.150 | 0.769 | _   | 3  |



|               |     |       |       |       |       |   |   |
|---------------|-----|-------|-------|-------|-------|---|---|
| SMil_00021185 | 348 | 0.102 | 0.046 | 0.272 | 0.355 | * | 5 |
| SMil_00021184 | 332 | 0.930 | 0.023 | 0.066 | 0.181 | C | 2 |
| SMil_00021036 | 212 | 0.006 | 0.059 | 0.980 | 0.012 | S | 1 |
| SMil_00020998 | 301 | 0.127 | 0.052 | 0.257 | 0.822 | _ | 3 |
| SMil_00020663 | 280 | 0.037 | 0.124 | 0.207 | 0.779 | _ | 3 |
| SMil_00020342 | 409 | 0.178 | 0.379 | 0.011 | 0.079 | * | 4 |
| SMil_00019970 | 313 | 0.516 | 0.134 | 0.053 | 0.551 | _ | 5 |
| SMil_00019654 | 256 | 0.120 | 0.068 | 0.107 | 0.932 | _ | 1 |
| SMil_00019542 | 288 | 0.023 | 0.116 | 0.027 | 0.929 | _ | 1 |
| SMil_00019454 | 120 | 0.079 | 0.212 | 0.064 | 0.558 | _ | 4 |
| SMil_00019259 | 314 | 0.169 | 0.104 | 0.110 | 0.836 | _ | 2 |
| SMil_00019235 | 180 | 0.054 | 0.109 | 0.094 | 0.885 | _ | 2 |
| SMil_00019234 | 356 | 0.368 | 0.064 | 0.082 | 0.582 | _ | 4 |
| SMil_00019233 | 322 | 0.129 | 0.053 | 0.161 | 0.782 | _ | 2 |
| SMil_00019093 | 205 | 0.020 | 0.863 | 0.050 | 0.183 | M | 2 |
| SMil_00019092 | 337 | 0.148 | 0.134 | 0.039 | 0.820 | _ | 2 |
| SMil_00019091 | 240 | 0.054 | 0.161 | 0.045 | 0.904 | _ | 2 |
| SMil_00019079 | 225 | 0.107 | 0.093 | 0.047 | 0.925 | _ | 1 |
| SMil_00018996 | 394 | 0.009 | 0.740 | 0.351 | 0.055 | * | 4 |
| SMil_00018670 | 157 | 0.036 | 0.072 | 0.037 | 0.957 | _ | 1 |
| SMil_00018669 | 373 | 0.101 | 0.137 | 0.101 | 0.865 | _ | 2 |
| SMil_00018668 | 302 | 0.016 | 0.614 | 0.034 | 0.633 | _ | 5 |
| SMil_00018601 | 351 | 0.068 | 0.116 | 0.307 | 0.737 | _ | 3 |
| SMil_00018452 | 376 | 0.137 | 0.136 | 0.040 | 0.843 | _ | 2 |
| SMil_00018124 | 342 | 0.763 | 0.304 | 0.039 | 0.088 | C | 3 |
| SMil_00018123 | 362 | 0.683 | 0.027 | 0.297 | 0.425 | C | 4 |
| SMil_00018122 | 268 | 0.072 | 0.064 | 0.266 | 0.865 | _ | 3 |
| SMil_00018100 | 368 | 0.081 | 0.078 | 0.085 | 0.931 | _ | 1 |
| SMil_00018082 | 363 | 0.108 | 0.099 | 0.080 | 0.904 | _ | 2 |
| SMil_00018080 | 176 | 0.182 | 0.120 | 0.101 | 0.665 | _ | 3 |
| SMil_00017774 | 324 | 0.180 | 0.041 | 0.252 | 0.474 | * | 4 |
| SMil_00016767 | 248 | 0.260 | 0.030 | 0.024 | 0.871 | _ | 2 |
| SMil_00016766 | 238 | 0.246 | 0.069 | 0.127 | 0.840 | _ | 3 |
| SMil_00016764 | 309 | 0.144 | 0.092 | 0.101 | 0.874 | _ | 2 |
| SMil_00016763 | 324 | 0.240 | 0.222 | 0.058 | 0.599 | _ | 4 |
| SMil_00016603 | 298 | 0.031 | 0.390 | 0.056 | 0.854 | _ | 3 |
| SMil_00016302 | 296 | 0.158 | 0.079 | 0.198 | 0.656 | _ | 3 |
| SMil_00016123 | 190 | 0.029 | 0.019 | 0.719 | 0.421 | S | 4 |
| SMil_00016116 | 376 | 0.094 | 0.122 | 0.078 | 0.859 | _ | 2 |
| SMil_00016112 | 129 | 0.014 | 0.349 | 0.255 | 0.695 | _ | 4 |
| SMil_00016110 | 369 | 0.077 | 0.114 | 0.118 | 0.911 | _ | 2 |
| SMil_00016109 | 369 | 0.345 | 0.081 | 0.061 | 0.758 | _ | 3 |
| SMil_00016062 | 364 | 0.106 | 0.090 | 0.083 | 0.917 | _ | 1 |
| SMil_00015044 | 308 | 0.112 | 0.151 | 0.073 | 0.856 | _ | 2 |

|               |     |       |       |       |       |   |   |
|---------------|-----|-------|-------|-------|-------|---|---|
| SMil_00014774 | 298 | 0.166 | 0.088 | 0.180 | 0.798 | _ | 2 |
| SMil_00014618 | 299 | 0.068 | 0.116 | 0.307 | 0.737 | _ | 3 |
| SMil_00014612 | 335 | 0.105 | 0.237 | 0.028 | 0.692 | _ | 3 |
| SMil_00014304 | 197 | 0.054 | 0.104 | 0.248 | 0.649 | _ | 3 |
| SMil_00014171 | 216 | 0.074 | 0.070 | 0.093 | 0.953 | _ | 1 |
| SMil_00013746 | 322 | 0.159 | 0.088 | 0.081 | 0.888 | _ | 2 |
| SMil_00013745 | 371 | 0.059 | 0.243 | 0.052 | 0.794 | _ | 3 |
| SMil_00013688 | 185 | 0.029 | 0.049 | 0.652 | 0.372 | S | 4 |
| SMil_00013638 | 364 | 0.118 | 0.106 | 0.134 | 0.831 | _ | 2 |
| SMil_00013637 | 282 | 0.190 | 0.077 | 0.104 | 0.850 | _ | 2 |
| SMil_00013636 | 311 | 0.263 | 0.074 | 0.159 | 0.751 | _ | 3 |
| SMil_00013635 | 293 | 0.050 | 0.093 | 0.020 | 0.940 | _ | 1 |
| SMil_00013634 | 189 | 0.085 | 0.249 | 0.095 | 0.778 | _ | 3 |
| SMil_00013632 | 239 | 0.381 | 0.099 | 0.109 | 0.609 | _ | 4 |
| SMil_00013421 | 428 | 0.122 | 0.177 | 0.088 | 0.677 | _ | 3 |
| SMil_00013255 | 327 | 0.002 | 0.480 | 0.677 | 0.249 | S | 5 |
| SMil_00013222 | 357 | 0.122 | 0.103 | 0.048 | 0.873 | _ | 2 |
| SMil_00013081 | 351 | 0.197 | 0.044 | 0.358 | 0.474 | * | 5 |
| SMil_00013059 | 335 | 0.185 | 0.282 | 0.069 | 0.312 | * | 5 |
| SMil_00012259 | 371 | 0.303 | 0.150 | 0.013 | 0.739 | _ | 3 |
| SMil_00012033 | 359 | 0.175 | 0.075 | 0.072 | 0.843 | _ | 2 |
| SMil_00012032 | 362 | 0.112 | 0.079 | 0.063 | 0.896 | _ | 2 |
| SMil_00011070 | 407 | 0.635 | 0.633 | 0.004 | 0.021 | C | 5 |
| SMil_00011064 | 314 | 0.078 | 0.065 | 0.291 | 0.747 | _ | 3 |
| SMil_00010684 | 378 | 0.400 | 0.072 | 0.057 | 0.656 | _ | 4 |
| SMil_00009013 | 361 | 0.605 | 0.046 | 0.154 | 0.223 | * | 4 |
| SMil_00009012 | 356 | 0.368 | 0.064 | 0.082 | 0.582 | _ | 4 |
| SMil_00008970 | 335 | 0.225 | 0.158 | 0.080 | 0.706 | _ | 3 |
| SMil_00008541 | 281 | 0.134 | 0.093 | 0.083 | 0.802 | _ | 2 |
| SMil_00008540 | 281 | 0.158 | 0.086 | 0.092 | 0.764 | _ | 2 |
| SMil_00008090 | 392 | 0.732 | 0.061 | 0.076 | 0.377 | C | 4 |
| SMil_00007843 | 358 | 0.094 | 0.086 | 0.083 | 0.898 | _ | 1 |
| SMil_00007557 | 311 | 0.061 | 0.123 | 0.153 | 0.883 | _ | 2 |
| SMil_00006860 | 293 | 0.003 | 0.153 | 0.704 | 0.207 | S | 3 |
| SMil_00006313 | 405 | 0.144 | 0.483 | 0.004 | 0.155 | * | 4 |
| SMil_00006040 | 347 | 0.092 | 0.169 | 0.129 | 0.704 | _ | 3 |
| SMil_00005833 | 366 | 0.231 | 0.106 | 0.086 | 0.745 | _ | 3 |
| SMil_00005648 | 312 | 0.057 | 0.111 | 0.115 | 0.914 | _ | 2 |
| SMil_00005410 | 392 | 0.021 | 0.497 | 0.106 | 0.135 | * | 4 |
| SMil_00004980 | 254 | 0.075 | 0.075 | 0.316 | 0.583 | _ | 4 |
| SMil_00004726 | 303 | 0.124 | 0.062 | 0.682 | 0.038 | S | 3 |
| SMil_00004141 | 331 | 0.091 | 0.062 | 0.087 | 0.768 | _ | 2 |
| SMil_00003886 | 346 | 0.096 | 0.138 | 0.068 | 0.743 | _ | 2 |
| SMil_00003616 | 335 | 0.120 | 0.177 | 0.209 | 0.461 | * | 4 |

|               |     |       |       |       |       |   |   |
|---------------|-----|-------|-------|-------|-------|---|---|
| SMil_00001764 | 331 | 0.078 | 0.080 | 0.009 | 0.954 | _ | 1 |
| SMil_00001058 | 367 | 0.022 | 0.229 | 0.034 | 0.952 | _ | 2 |
| SMil_00001015 | 308 | 0.580 | 0.095 | 0.070 | 0.087 | * | 3 |
| SMil_00000574 | 207 | 0.045 | 0.044 | 0.874 | 0.069 | S | 1 |
| SMil_00000263 | 410 | 0.090 | 0.192 | 0.045 | 0.702 | _ | 3 |

---

Supplementary Table 3. The identification of homologous 2OGD members between *S. miltiorrhiza*, *A. thaliana*, and *O. sativa*.

| Sm2OGD_ID     | At2OGD_ID   | Class<br>( <i>A. thaliana</i> ) | Identity<br>( <i>A. thaliana</i> ) | E value ( <i>A. thaliana</i> ) | Bit score<br>( <i>A. thaliana</i> ) | Os2OGD_ID  | Class ( <i>O. sativa</i> ) | Identity<br>( <i>O. sativa</i> ) | E value ( <i>O. sativa</i> ) | Bit score<br>( <i>O. sativa</i> ) |
|---------------|-------------|---------------------------------|------------------------------------|--------------------------------|-------------------------------------|------------|----------------------------|----------------------------------|------------------------------|-----------------------------------|
| SMil_00001058 | AT1G31600.1 | DOXA                            | 57.33                              | 1.00E-144                      | 410                                 | Os04g51360 | DOXA                       | 55.18                            | 2E-139                       | 393                               |
| SMil_00013421 | AT4G02485.1 | DOXA                            | 47.9                               | 3.00E-31                       | 112                                 | Os11g43610 | DOXA                       | 43.85                            | 3E-27                        | 102                               |
| SMil_00021498 | AT4G02940.1 | DOXA                            | 49.81                              | 2.00E-141                      | 412                                 | Os05g33310 | DOXA                       | 48.49                            | 7E-97                        | 291                               |
| SMil_00001015 | AT5G66060.1 | DOXB                            | 72.16                              | 3.00E-152                      | 421                                 | Os02g58070 | DOXB                       | 75.68                            | 3E-130                       | 366                               |
| SMil_00001764 | AT5G18900.1 | DOXB                            | 72.86                              | 2.00E-150                      | 418                                 | Os05g41010 | DOXB                       | 67.54                            | 5E-138                       | 387                               |
| SMil_00004726 | AT3G28480.1 | DOXB                            | 68.14                              | 3.00E-162                      | 447                                 | Os10g27340 | DOXB                       | 69.78                            | 2E-144                       | 402                               |
| SMil_00006860 | AT4G33910.1 | DOXB                            | 71.77                              | 1.00E-139                      | 389                                 | Os03g55380 | DOXB                       | 74.22                            | 1E-129                       | 364                               |
| SMil_00013255 | AT4G33910.1 | DOXB                            | 65.03                              | 7.00E-135                      | 378                                 | Os03g55380 | DOXB                       | 58.73                            | 8E-125                       | 353                               |
| SMil_00018996 | AT1G20270.1 | DOXB                            | 72.6                               | 2.00E-141                      | 397                                 | Os02g58070 | DOXB                       | 82.43                            | 7E-135                       | 381                               |
| SMil_00021036 | AT2G43080.1 | DOXB                            | 65.44                              | 8.00E-104                      | 294                                 | Os04g27850 | DOXB                       | 65.57                            | 1E-103                       | 293                               |
| SMil_00023889 | AT1G20270.1 | DOXB                            | 60.92                              | 2.00E-122                      | 345                                 | Os02g58070 | DOXB                       | 64.14                            | 1E-111                       | 319                               |
| SMil_00000574 | AT1G52800.1 | DOXC                            | 51.08                              | 1.00E-69                       | 208                                 | Os08g32170 | DOXC                       | 31.09                            | 4E-31                        | 108                               |
| SMil_00003616 | AT5G08640.1 | DOXC                            | 62.99                              | 1.00E-132                      | 375                                 | Os02g52840 | DOXC                       | 56.42                            | 5E-110                       | 317                               |
| SMil_00003886 | AT1G15550.1 | DOXC                            | 45.76                              | 3.00E-103                      | 301                                 | Os01g08220 | DOXC                       | 39.37                            | 5E-67                        | 208                               |
| SMil_00004141 | AT4G23340.1 | DOXC                            | 55                                 | 2.00E-108                      | 312                                 | Os03g63970 | DOXC                       | 31.21                            | 7E-28                        | 104                               |
| SMil_00004980 | AT5G08640.1 | DOXC                            | 56.87                              | 4.00E-98                       | 283                                 | Os02g52840 | DOXC                       | 50.38                            | 5E-84                        | 247                               |
| SMil_00005410 | AT3G50210.1 | DOXC                            | 58.68                              | 2.00E-142                      | 402                                 | Os09g07020 | DOXC                       | 56.46                            | 5E-134                       | 384                               |
| SMil_00005648 | AT1G02400.1 | DOXC                            | 52.06                              | 6.00E-103                      | 298                                 | Os05g06670 | DOXC                       | 42.26                            | 9E-75                        | 227                               |
| SMil_00005833 | AT5G05600.1 | DOXC                            | 60.61                              | 2.00E-162                      | 452                                 | Os05g03640 | DOXC                       | 55.71                            | 4E-140                       | 396                               |
| SMil_00006040 | AT4G16330.1 | DOXC                            | 65.37                              | 2.00E-127                      | 358                                 | Os06g06720 | DOXC                       | 57.76                            | 3E-134                       | 379                               |

|               |             |      |       |           |     |            |      |       |        |     |
|---------------|-------------|------|-------|-----------|-----|------------|------|-------|--------|-----|
| SMil_00007557 | AT2G19590.1 | DOXC | 58.61 | 9.00E-134 | 375 | Os06g37590 | DOXC | 48.5  | 3E-109 | 312 |
| SMil_00007843 | AT5G07480.1 | DOXC | 54.78 | 4.00E-139 | 393 | Os04g57180 | DOXC | 44.12 | 4E-94  | 277 |
| SMil_00008090 | AT5G51810.1 | DOXC | 59.95 | 1.00E-162 | 455 | Os03g63970 | DOXC | 56.2  | 1E-142 | 404 |
| SMil_00008540 | AT3G19010.1 | DOXC | 53.54 | 6.00E-55  | 174 | Os08g15149 | DOXC | 47.12 | 2E-81  | 240 |
| SMil_00008541 | AT3G19010.1 | DOXC | 53.54 | 6.00E-55  | 174 | Os08g15149 | DOXC | 47.12 | 3E-81  | 240 |
| SMil_00008970 | AT3G21420.1 | DOXC | 65.75 | 3.00E-165 | 458 | Os01g70930 | DOXC | 58.47 | 6E-148 | 414 |
| SMil_00009012 | AT4G10500.1 | DOXC | 37.94 | 5.00E-65  | 203 | Os08g37456 | DOXC | 43.23 | 2E-88  | 263 |
| SMil_00009013 | AT4G10490.1 | DOXC | 38.59 | 2.00E-64  | 201 | Os08g37456 | DOXC | 43.91 | 4E-91  | 270 |
| SMil_00010684 | AT4G25420.1 | DOXC | 71.26 | 0         | 530 | Os03g63970 | DOXC | 60.56 | 1E-161 | 451 |
| SMil_00011064 | AT1G05010.1 | DOXC | 72.14 | 2.00E-163 | 451 | Os09g27820 | DOXC | 71.16 | 3E-152 | 423 |
| SMil_00012032 | AT1G04350.1 | DOXC | 41.9  | 3.00E-95  | 281 | Os03g48430 | DOXC | 41.76 | 4E-86  | 258 |
| SMil_00012033 | AT1G06620.1 | DOXC | 46.89 | 1.00E-120 | 346 | Os03g48430 | DOXC | 43.73 | 2E-98  | 290 |
| SMil_00012259 | AT1G17020.1 | DOXC | 53.07 | 1.00E-144 | 407 | Os10g40880 | DOXC | 43.87 | 3E-100 | 294 |
| SMil_00013059 | AT5G24530.1 | DOXC | 65.79 | 3.00E-163 | 452 | Os03g03034 | DOXC | 60.36 | 3E-152 | 424 |
| SMil_00013081 | AT1G49390.1 | DOXC | 51.62 | 2.00E-115 | 332 | Os06g08032 | DOXC | 40.91 | 4E-79  | 239 |
| SMil_00013222 | AT3G13610.1 | DOXC | 47.14 | 3.00E-119 | 342 | Os03g03034 | DOXC | 33.23 | 3E-55  | 177 |
| SMil_00013632 | AT1G52800.1 | DOXC | 45.53 | 4.00E-75  | 223 | Os08g32170 | DOXC | 29.63 | 2E-30  | 107 |
| SMil_00013634 | AT1G52820.1 | DOXC | 42.63 | 1.00E-56  | 174 | Os05g50090 | DOXC | 39.42 | 9E-35  | 119 |
| SMil_00013635 | AT1G52820.1 | DOXC | 48.73 | 5.00E-98  | 288 | Os08g32160 | DOXC | 27.27 | 5E-40  | 137 |
| SMil_00013636 | AT1G52820.1 | DOXC | 59.49 | 6.00E-132 | 371 | Os08g32170 | DOXC | 32.9  | 2E-58  | 183 |
| SMil_00013637 | AT1G52820.1 | DOXC | 50    | 2.00E-110 | 315 | Os08g32170 | DOXC | 29.35 | 1E-44  | 147 |
| SMil_00013638 | AT1G15550.1 | DOXC | 59.88 | 8.00E-141 | 397 | Os01g08220 | DOXC | 41.35 | 3E-87  | 261 |
| SMil_00013688 | AT5G07480.1 | DOXC | 45.88 | 3.00E-52  | 164 | Os04g57160 | DOXC | 41.62 | 3E-45  | 145 |
| SMil_00013745 | AT3G19000.1 | DOXC | 57.46 | 2.00E-143 | 404 | Os03g42130 | DOXC | 52.82 | 9E-133 | 377 |
| SMil_00013746 | AT3G19000.1 | DOXC | 52.96 | 2.00E-114 | 328 | Os03g42130 | DOXC | 52.59 | 8E-106 | 306 |
| SMil_00014171 | AT4G10490.1 | DOXC | 33.94 | 2.00E-30  | 107 | Os04g55070 | DOXC | 56.76 | 4E-89  | 258 |

|               |             |      |       |           |     |            |      |       |        |     |
|---------------|-------------|------|-------|-----------|-----|------------|------|-------|--------|-----|
| SMil_00014304 | AT1G78440.1 | DOXC | 56.57 | 4.00E-82  | 240 | Os01g55240 | DOXC | 58.25 | 9E-81  | 236 |
| SMil_00014612 | AT4G21200.1 | DOXC | 52.52 | 4.00E-129 | 365 | Os04g44150 | DOXC | 52.91 | 8E-124 | 353 |
| SMil_00014618 | AT3G51240.1 | DOXC | 70.55 | 4.00E-160 | 444 | Os04g56700 | DOXC | 69.72 | 9E-153 | 426 |
| SMil_00014774 | AT1G14130.1 | DOXC | 44.52 | 1.00E-84  | 250 | Os04g39980 | DOXC | 41.86 | 2E-81  | 241 |
| SMil_00015044 | AT1G17020.1 | DOXC | 38.13 | 7.00E-56  | 178 | Os01g24980 | DOXC | 41.46 | 8E-62  | 192 |
| SMil_00016062 | AT1G06620.1 | DOXC | 45.79 | 2.00E-104 | 305 | Os03g48430 | DOXC | 39.4  | 9E-85  | 254 |
| SMil_00016109 | AT1G06620.1 | DOXC | 49.44 | 8.00E-110 | 319 | Os03g48430 | DOXC | 43.72 | 3E-90  | 269 |
| SMil_00016110 | AT1G06620.1 | DOXC | 46.8  | 8.00E-117 | 337 | Os03g48430 | DOXC | 43.84 | 1E-101 | 298 |
| SMil_00016112 | AT5G43440.1 | DOXC | 58.56 | 3.00E-34  | 115 | Os04g10350 | DOXC | 57.66 | 3E-34  | 115 |
| SMil_00016116 | AT1G06620.1 | DOXC | 52.02 | 4.00E-137 | 389 | Os03g48430 | DOXC | 46.21 | 7E-107 | 312 |
| SMil_00016123 | AT4G21200.1 | DOXC | 60.99 | 5.00E-82  | 240 | Os04g44150 | DOXC | 51.31 | 2E-66  | 201 |
| SMil_00016302 | AT5G51810.1 | DOXC | 48.34 | 3.00E-85  | 253 | Os01g66100 | DOXC | 50.76 | 1E-77  | 234 |
| SMil_00016603 | AT1G14130.1 | DOXC | 45.78 | 2.00E-70  | 213 | Os04g39980 | DOXC | 41.13 | 1E-63  | 196 |
| SMil_00016763 | AT1G52800.1 | DOXC | 44.13 | 2.00E-103 | 299 | Os08g32170 | DOXC | 32.23 | 3E-53  | 170 |
| SMil_00016764 | AT1G52800.1 | DOXC | 55.71 | 5.00E-129 | 363 | Os08g32160 | DOXC | 32.9  | 8E-52  | 166 |
| SMil_00016766 | AT1G52800.1 | DOXC | 48.11 | 2.00E-83  | 244 | Os08g32170 | DOXC | 30.28 | 3E-37  | 125 |
| SMil_00016767 | AT1G52800.1 | DOXC | 47.28 | 2.00E-64  | 196 | Os08g32170 | DOXC | 29.69 | 8E-29  | 103 |
| SMil_00017774 | AT1G30040.1 | DOXC | 60.13 | 1.00E-138 | 390 | Os01g55240 | DOXC | 56.62 | 4E-129 | 365 |
| SMil_00018080 | AT1G04380.1 | DOXC | 52.91 | 5.00E-65  | 196 | Os04g10350 | DOXC | 47.2  | 2E-52  | 164 |
| SMil_00018082 | AT1G06620.1 | DOXC | 45.38 | 8.00E-106 | 308 | Os03g48430 | DOXC | 41.42 | 2E-84  | 254 |
| SMil_00018100 | AT1G06620.1 | DOXC | 47.75 | 6.00E-120 | 345 | Os03g48430 | DOXC | 43.47 | 1E-97  | 288 |
| SMil_00018122 | AT4G10490.1 | DOXC | 39.76 | 2.00E-54  | 172 | Os08g37456 | DOXC | 43.44 | 1E-67  | 206 |
| SMil_00018123 | AT4G10500.1 | DOXC | 37.36 | 2.00E-72  | 222 | Os08g37456 | DOXC | 42.59 | 4E-83  | 249 |
| SMil_00018124 | AT2G36690.1 | DOXC | 40.65 | 1.00E-65  | 204 | Os08g37456 | DOXC | 45.1  | 1E-79  | 239 |
| SMil_00018452 | AT2G36690.1 | DOXC | 61.93 | 6.00E-165 | 459 | Os08g44590 | DOXC | 52.1  | 2E-132 | 377 |
| SMil_00018601 | AT3G51240.1 | DOXC | 74.48 | 0         | 537 | Os04g56700 | DOXC | 73.42 | 0      | 504 |

|               |             |      |       |           |      |            |      |       |        |     |
|---------------|-------------|------|-------|-----------|------|------------|------|-------|--------|-----|
| SMil_00018668 | AT1G04380.1 | DOXC | 49.72 | 5.00E-61  | 191  | Os04g10350 | DOXC | 46.91 | 3E-56  | 179 |
| SMil_00018669 | AT5G59530.1 | DOXC | 49.72 | 4.00E-123 | 353  | Os03g48430 | DOXC | 45.33 | 3E-107 | 313 |
| SMil_00018670 | AT5G43440.1 | DOXC | 47.13 | 8.00E-54  | 167  | Os04g10350 | DOXC | 47.97 | 2E-52  | 163 |
| SMil_00019079 | AT1G30040.1 | DOXC | 71.54 | 3.00E-70  | 211  | Os01g55240 | DOXC | 69.01 | 2E-67  | 204 |
| SMil_00019091 | AT5G20400.1 | DOXC | 53.68 | 1.00E-96  | 280  | Os02g17940 | DOXC | 48.07 | 9E-81  | 239 |
| SMil_00019092 | AT5G20400.1 | DOXC | 45.32 | 5.00E-76  | 231  | Os02g17940 | DOXC | 39.93 | 2E-62  | 196 |
| SMil_00019093 | AT5G20400.1 | DOXC | 47.64 | 3.00E-54  | 169  | Os02g17940 | DOXC | 39.06 | 7E-39  | 129 |
| SMil_00019233 | AT4G10490.1 | DOXC | 39.57 | 6.00E-63  | 196  | Os08g37456 | DOXC | 44.07 | 4E-89  | 263 |
| SMil_00019234 | AT4G10500.1 | DOXC | 37.94 | 4.00E-64  | 201  | Os08g37456 | DOXC | 43.59 | 2E-90  | 268 |
| SMil_00019235 | AT1G78550.1 | DOXC | 44.44 | 4.00E-46  | 148  | Os03g03034 | DOXC | 44    | 4E-50  | 158 |
| SMil_00019259 | AT1G52820.1 | DOXC | 52.66 | 2.00E-120 | 342  | Os08g32170 | DOXC | 33.33 | 1E-60  | 189 |
| SMil_00019454 | AT1G14130.1 | DOXC | 47.22 | 3.00E-20  | 76.6 | Os04g39980 | DOXC | 48.57 | 3E-22  | 82  |
| SMil_00019542 | AT1G52800.1 | DOXC | 46.41 | 6.00E-51  | 163  | Os05g50090 | DOXC | 37.5  | 2E-27  | 102 |
| SMil_00019654 | AT1G52800.1 | DOXC | 48.65 | 5.00E-66  | 201  | Os08g32170 | DOXC | 30.94 | 4E-29  | 105 |
| SMil_00019970 | AT1G52790.1 | DOXC | 38.19 | 6.00E-78  | 233  | Os08g32170 | DOXC | 29.9  | 1E-47  | 155 |
| SMil_00020342 | AT2G44800.1 | DOXC | 35.56 | 5.00E-64  | 202  | Os08g37456 | DOXC | 42.3  | 5E-87  | 261 |
| SMil_00020663 | AT1G30040.1 | DOXC | 46.41 | 8.00E-91  | 266  | Os01g55240 | DOXC | 44.44 | 8E-85  | 250 |
| SMil_00020998 | AT1G14130.1 | DOXC | 44.86 | 5.00E-91  | 266  | Os04g39980 | DOXC | 44.09 | 1E-83  | 247 |
| SMil_00021184 | AT4G10490.1 | DOXC | 35.49 | 4.00E-52  | 169  | Os08g37456 | DOXC | 36.22 | 9E-62  | 193 |
| SMil_00021185 | AT2G36690.1 | DOXC | 35.88 | 5.00E-75  | 229  | Os08g37456 | DOXC | 42.9  | 2E-92  | 273 |
| SMil_00021186 | AT4G10490.1 | DOXC | 36.15 | 1.00E-49  | 160  | Os08g37456 | DOXC | 38    | 4E-58  | 181 |
| SMil_00021188 | AT4G10490.1 | DOXC | 42.63 | 5.00E-46  | 148  | Os08g37456 | DOXC | 42.22 | 4E-47  | 150 |
| SMil_00021251 | AT1G04350.1 | DOXC | 45.45 | 2.00E-54  | 169  | Os08g30080 | DOXC | 44.62 | 2E-47  | 152 |
| SMil_00021366 | AT1G30040.1 | DOXC | 56.05 | 3.00E-93  | 271  | Os01g55240 | DOXC | 52.68 | 8E-78  | 231 |
| SMil_00022077 | AT5G05600.1 | DOXC | 58.61 | 7.00E-125 | 355  | Os05g03640 | DOXC | 54.93 | 7E-115 | 329 |
| SMil_00022092 | AT1G77330.1 | DOXC | 67.42 | 3.00E-146 | 407  | Os05g05680 | DOXC | 62.82 | 5E-126 | 355 |

|               |             |      |       |           |     |            |      |       |        |     |
|---------------|-------------|------|-------|-----------|-----|------------|------|-------|--------|-----|
| SMil_00022299 | AT1G30040.1 | DOXC | 61.11 | 4.00E-121 | 343 | Os01g55240 | DOXC | 60.75 | 9E-112 | 319 |
| SMil_00022446 | AT2G36690.1 | DOXC | 34.3  | 1.00E-49  | 163 | Os08g37456 | DOXC | 38.67 | 2E-68  | 211 |
| SMil_00022937 | AT1G35190.1 | DOXC | 64.29 | 3.00E-97  | 279 | Os01g09300 | DOXC | 56.61 | 6E-104 | 297 |
| SMil_00022938 | AT1G35190.1 | DOXC | 57.02 | 7.00E-119 | 340 | Os01g09300 | DOXC | 54.76 | 1E-125 | 359 |
| SMil_00023724 | AT1G14130.1 | DOXC | 53.77 | 7.00E-108 | 309 | Os04g39980 | DOXC | 48.81 | 2E-95  | 277 |
| SMil_00023785 | AT1G17020.1 | DOXC | 51.59 | 6.00E-118 | 339 | Os10g41020 | DOXC | 40    | 8E-86  | 257 |
| SMil_00024026 | AT2G30830.1 | DOXC | 38.1  | 1.00E-57  | 182 | Os03g48430 | DOXC | 37.57 | 9E-49  | 159 |
| SMil_00024092 | AT4G10490.1 | DOXC | 35.69 | 2.00E-66  | 206 | Os07g07410 | DOXC | 33.24 | 1E-66  | 207 |
| SMil_00024282 | AT1G49390.1 | DOXC | 48.96 | 2.00E-121 | 347 | Os06g08023 | DOXC | 41.3  | 2E-92  | 274 |
| SMil_00024284 | AT5G20400.1 | DOXC | 52.05 | 2.00E-119 | 343 | Os02g17940 | DOXC | 46.06 | 3E-98  | 288 |
| SMil_00024563 | AT4G21200.1 | DOXC | 56.85 | 3.00E-140 | 395 | Os04g44150 | DOXC | 50.29 | 1E-116 | 335 |
| SMil_00024988 | AT5G58660.1 | DOXC | 47.78 | 7.00E-98  | 286 | Os04g33360 | DOXC | 39.62 | 2E-64  | 201 |
| SMil_00025213 | AT2G44800.1 | DOXC | 35.49 | 3.00E-65  | 203 | Os08g37456 | DOXC | 42.6  | 3E-87  | 259 |
| SMil_00025718 | AT3G51240.1 | DOXC | 75.96 | 0         | 546 | Os04g56700 | DOXC | 73.85 | 0      | 513 |
| SMil_00025860 | AT1G77330.1 | DOXC | 69.21 | 2.00E-161 | 445 | Os05g05680 | DOXC | 59.94 | 3E-134 | 376 |
| SMil_00026100 | AT5G07200.1 | DOXC | 39.43 | 2.00E-49  | 160 | Os03g42130 | DOXC | 36.99 | 5E-43  | 142 |
| SMil_00026530 | AT5G51810.1 | DOXC | 59.88 | 1.00E-157 | 440 | Os03g63970 | DOXC | 55.56 | 1E-136 | 387 |
| SMil_00026896 | AT1G77330.1 | DOXC | 67.74 | 2.00E-145 | 405 | Os05g05680 | DOXC | 61.66 | 2E-123 | 348 |
| SMil_00027265 | AT5G24530.1 | DOXC | 63.85 | 2.00E-150 | 418 | Os03g03034 | DOXC | 63.27 | 2E-149 | 416 |
| SMil_00027610 | AT5G24530.1 | DOXC | 39.62 | 2.00E-58  | 183 | Os03g03034 | DOXC | 41.04 | 3E-59  | 184 |
| SMil_00027988 | AT5G24530.1 | DOXC | 39.76 | 2.00E-71  | 219 | Os10g39140 | DOXC | 38.08 | 5E-70  | 215 |
| SMil_00028133 | AT4G10490.1 | DOXC | 33.04 | 2.00E-29  | 105 | Os04g55070 | DOXC | 56.77 | 1E-93  | 270 |
| SMil_00028460 | AT1G47990.1 | DOXC | 49.52 | 2.00E-101 | 294 | Os01g55240 | DOXC | 43.71 | 1E-76  | 230 |
| SMil_00028466 | AT1G52820.1 | DOXC | 62.12 | 7.00E-87  | 252 | Os08g32170 | DOXC | 36.68 | 8E-43  | 139 |
| SMil_00029330 | AT1G04380.1 | DOXC | 54.94 | 3.00E-63  | 191 | Os04g10350 | DOXC | 52.6  | 1E-59  | 183 |
| SMil_00029331 | AT1G06620.1 | DOXC | 46.41 | 5.00E-115 | 333 | Os03g48430 | DOXC | 41.69 | 8E-96  | 284 |



---

|               |             |              |       |           |      |            |              |       |        |     |
|---------------|-------------|--------------|-------|-----------|------|------------|--------------|-------|--------|-----|
| SMil_00029346 | AT1G52820.1 | DOXC         | 58.23 | 6.00E-136 | 381  | Os08g32170 | DOXC         | 32.58 | 4E-61  | 190 |
| SMil_00029434 | AT4G22880.1 | DOXC         | 86.93 | 2.00E-97  | 279  | Os01g27490 | DOXC         | 57.42 | 1E-66  | 201 |
| SMil_00029593 | AT3G21420.1 | DOXC         | 73.58 | 6.00E-107 | 305  | Os01g70930 | DOXC         | 65.97 | 3E-93  | 270 |
| SMil_00030201 | AT4G25420.1 | DOXC         | 67.14 | 7.00E-179 | 497  | Os03g63970 | DOXC         | 59.25 | 4E-160 | 449 |
| SMil_00030383 | AT3G60290.1 | DOXC         | 41.83 | 4.00E-63  | 197  | Os04g49210 | DOXC         | 39.31 | 3E-62  | 194 |
| SMil_00000263 | AT1G22950.1 | unclassified | 63.58 | 9.00E-164 | 459  | Os01g31770 | unclassified | 62.63 | 4E-177 | 493 |
| SMil_00006313 | AT1G68080.1 | unclassified | 49.75 | 2.00E-112 | 328  | Os03g13550 | unclassified | 42.81 | 7E-76  | 231 |
| SMil_00011070 | AT3G63290.1 | unclassified | 25.32 | 2.00E-16  | 73.2 | Os05g48230 | unclassified | 62.17 | 2E-164 | 461 |

---

Supplementary Table 4. The gene expression of 2OGDs in different organs, tissues, and following MeJA treatment.

| Gene_ID       | Clades | Classes | Periderm | Phloem | xylem | Flower  | Stem   | Leaf   | Root   | MeJA-0  | MeJA-12 |
|---------------|--------|---------|----------|--------|-------|---------|--------|--------|--------|---------|---------|
| SMil_00011064 | ACO    | DOXC    | 26.63    | 55.38  | 30.69 | 2082.68 | 303.86 | 316.91 | 108.12 | 1159.81 | 2034.96 |
| SMil_00022077 | ACO    | DOXC    | 10.04    | 4.58   | 1.92  | 20.42   | 51.19  | 1.09   | 44.51  | 3.00    | 182.02  |
| SMil_00005833 | ACO    | DOXC    | 7.33     | 2.32   | 0.99  | 5.36    | 12.01  | 13.68  | 22.69  | 60.67   | 207.65  |
| SMil_00006040 | ACO    | DOXC    | 10.95    | 6.98   | 7.69  | 58.06   | 25.26  | 8.19   | 11.20  | 9.34    | 13.41   |
| SMil_00026896 | ACO    | DOXC    | 0.12     | 0.00   | 0.09  | 0.22    | 2.71   | 0.00   | 3.20   | 0.11    | 0.48    |
| SMil_00022092 | ACO    | DOXC    | 0.76     | 0.42   | 0.30  | 0.20    | 1.14   | 0.25   | 1.69   | 0.35    | 0.55    |
| SMil_00007557 | ACO    | DOXC    | 0.24     | 3.41   | 2.40  | 0.14    | 3.35   | 0.00   | 1.67   | 0.03    | 0.00    |
| SMil_00025860 | ACO    | DOXC    | 2.83     | 1.33   | 0.26  | 0.00    | 0.03   | 0.00   | 0.34   | 0.04    | 0.00    |
| SMil_00016766 | AOP    | DOXC    | 49.61    | 52.69  | 7.71  | 0.05    | 3.55   | 0.00   | 172.47 | 0.00    | 0.00    |
| SMil_00019970 | AOP    | DOXC    | 34.78    | 18.96  | 24.66 | 0.17    | 0.22   | 0.18   | 63.96  | 0.15    | 0.20    |
| SMil_00019654 | AOP    | DOXC    | 27.33    | 27.10  | 25.69 | 66.41   | 29.28  | 8.72   | 29.37  | 11.50   | 15.14   |
| SMil_00013632 | AOP    | DOXC    | 9.59     | 8.36   | 0.47  | 0.04    | 0.82   | 0.00   | 11.16  | 0.00    | 0.00    |
| SMil_00019259 | AOP    | DOXC    | 6.54     | 0.75   | 0.08  | 0.06    | 0.37   | 0.00   | 10.35  | 0.00    | 0.00    |
| SMil_00029346 | AOP    | DOXC    | 15.45    | 17.89  | 14.95 | 0.02    | 3.80   | 0.63   | 8.41   | 0.66    | 0.68    |
| SMil_00013636 | AOP    | DOXC    | 10.94    | 15.86  | 12.65 | 0.04    | 0.46   | 0.40   | 4.56   | 0.27    | 0.48    |
| SMil_00028466 | AOP    | DOXC    | 0.59     | 0.72   | 0.57  | 0.00    | 0.90   | 0.00   | 3.83   | 0.00    | 0.02    |
| SMil_00016763 | AOP    | DOXC    | 2.94     | 3.00   | 0.14  | 0.00    | 0.12   | 0.00   | 2.41   | 0.00    | 0.00    |
| SMil_00013637 | AOP    | DOXC    | 1.36     | 0.20   | 0.00  | 3.68    | 3.74   | 1.89   | 1.62   | 2.04    | 3.12    |
| SMil_00019542 | AOP    | DOXC    | 0.37     | 0.58   | 0.29  | 2.10    | 0.99   | 0.00   | 0.68   | 0.25    | 0.42    |
| SMil_00000574 | AOP    | DOXC    | 13.17    | 4.86   | 2.38  | 1.35    | 1.69   | 11.17  | 0.53   | 5.66    | 0.07    |
| SMil_00016767 | AOP    | DOXC    | 0.00     | 0.00   | 0.03  | 0.21    | 0.07   | 0.00   | 0.06   | 0.00    | 0.00    |
| SMil_00013634 | AOP    | DOXC    | 0.38     | 0.06   | 0.05  | 0.00    | 0.10   | 0.00   | 0.00   | 0.00    | 0.00    |
| SMil_00013635 | AOP    | DOXC    | 0.43     | 0.22   | 0.31  | 0.00    | 0.01   | 0.00   | 0.00   | 0.00    | 0.00    |

|               |               |      |        |        |        |        |        |       |        |       |        |
|---------------|---------------|------|--------|--------|--------|--------|--------|-------|--------|-------|--------|
| SMil_00016764 | AOP           | DOXC | 0.00   | 0.00   | 0.00   | 0.00   | 0.00   | 0.00  | 0.00   | 0.00  | 0.00   |
| SMil_00012259 | CODM/NCS      | DOXC | 412.59 | 143.92 | 129.72 | 265.95 | 1.06   | 0.48  | 138.44 | 1.44  | 0.54   |
| SMil_00024284 | CODM/NCS      | DOXC | 30.30  | 20.98  | 18.39  | 70.31  | 22.97  | 12.27 | 14.92  | 9.81  | 10.18  |
| SMil_00019091 | CODM/NCS      | DOXC | 19.05  | 17.08  | 13.94  | 6.99   | 5.21   | 4.82  | 10.14  | 2.27  | 2.41   |
| SMil_00013081 | CODM/NCS      | DOXC | 124.36 | 36.50  | 24.41  | 37.57  | 6.93   | 2.40  | 7.29   | 4.38  | 29.65  |
| SMil_00024282 | CODM/NCS      | DOXC | 135.18 | 55.22  | 19.65  | 3.55   | 4.23   | 0.39  | 2.55   | 0.29  | 5.19   |
| SMil_00019092 | CODM/NCS      | DOXC | 1.55   | 4.33   | 0.25   | 9.57   | 0.35   | 0.00  | 0.19   | 0.00  | 0.00   |
| SMil_00008970 | CODM/NCS      | DOXC | 0.26   | 2.82   | 0.76   | 8.59   | 3.87   | 1.35  | 0.15   | 0.69  | 0.21   |
| SMil_00019093 | CODM/NCS      | DOXC | 1.13   | 0.62   | 0.08   | 1.02   | 0.00   | 0.00  | 0.14   | 0.00  | 0.00   |
| SMil_00015044 | CODM/NCS      | DOXC | 1.91   | 0.00   | 0.00   | 0.00   | 0.01   | 0.00  | 0.09   | 0.00  | 0.00   |
| SMil_00029593 | CODM/NCS      | DOXC | 0.10   | 1.19   | 0.41   | 0.78   | 0.85   | 0.00  | 0.08   | 0.06  | 0.16   |
| SMil_00023785 | CODM/NCS      | DOXC | 0.80   | 0.05   | 0.00   | 2.52   | 0.79   | 3.89  | 0.06   | 8.59  | 23.04  |
| SMil_00012032 | D4H/GSLOH/BX6 | DOXC | 45.90  | 24.78  | 8.29   | 5.37   | 114.20 | 0.81  | 270.35 | 5.60  | 79.07  |
| SMil_00018668 | D4H/GSLOH/BX6 | DOXC | 73.56  | 23.72  | 0.39   | 22.87  | 33.40  | 2.62  | 52.94  | 0.00  | 0.03   |
| SMil_00018669 | D4H/GSLOH/BX6 | DOXC | 27.87  | 16.58  | 16.02  | 22.87  | 33.40  | 2.62  | 52.94  | 11.53 | 7.06   |
| SMil_00029331 | D4H/GSLOH/BX6 | DOXC | 41.15  | 9.12   | 3.67   | 4.51   | 14.41  | 3.65  | 13.68  | 3.41  | 26.07  |
| SMil_00018670 | D4H/GSLOH/BX6 | DOXC | 8.61   | 4.37   | 3.10   | 9.53   | 38.55  | 40.09 | 12.84  | 24.42 | 42.15  |
| SMil_00016110 | D4H/GSLOH/BX6 | DOXC | 17.93  | 5.92   | 3.64   | 25.01  | 79.04  | 35.64 | 11.98  | 60.41 | 482.59 |
| SMil_00029330 | D4H/GSLOH/BX6 | DOXC | 16.04  | 1.74   | 0.13   | 4.13   | 13.12  | 4.81  | 3.80   | 8.93  | 25.21  |
| SMil_00016116 | D4H/GSLOH/BX6 | DOXC | 2.06   | 2.25   | 1.87   | 8.11   | 11.08  | 2.44  | 2.14   | 9.56  | 5.29   |
| SMil_00024026 | D4H/GSLOH/BX6 | DOXC | 9.99   | 6.99   | 5.76   | 3.26   | 1.19   | 0.24  | 1.76   | 0.59  | 8.18   |
| SMil_00018100 | D4H/GSLOH/BX6 | DOXC | 50.15  | 9.09   | 0.66   | 0.02   | 0.02   | 0.00  | 1.23   | 0.00  | 0.00   |
| SMil_00018082 | D4H/GSLOH/BX6 | DOXC | 0.21   | 0.03   | 0.00   | 0.00   | 0.04   | 0.00  | 0.50   | 0.00  | 0.00   |
| SMil_00018080 | D4H/GSLOH/BX6 | DOXC | 0.42   | 0.14   | 0.00   | 0.00   | 0.00   | 0.00  | 0.16   | 0.00  | 0.00   |
| SMil_00016109 | D4H/GSLOH/BX6 | DOXC | 0.27   | 0.00   | 0.00   | 0.14   | 0.81   | 0.26  | 0.11   | 0.26  | 0.79   |
| SMil_00016062 | D4H/GSLOH/BX6 | DOXC | 1.11   | 0.21   | 0.05   | 0.06   | 31.11  | 0.08  | 0.02   | 0.03  | 0.02   |

|               |               |      |       |       |       |        |       |        |       |        |       |
|---------------|---------------|------|-------|-------|-------|--------|-------|--------|-------|--------|-------|
| SMil_00021251 | D4H/GSLOH/BX6 | DOXC | 0.53  | 0.13  | 0.00  | 0.28   | 0.20  | 0.00   | 0.00  | 0.41   | 0.72  |
| SMil_00012033 | D4H/GSLOH/BX6 | DOXC | 0.00  | 0.00  | 0.00  | 0.00   | 0.00  | 0.00   | 0.00  | 0.00   | 0.00  |
| SMil_00016112 | D4H/GSLOH/BX6 | DOXC | 0.00  | 0.00  | 0.00  | 0.00   | 0.00  | 0.00   | 0.00  | 0.00   | 0.00  |
| SMil_00023724 | DAO           | DOXC | 14.98 | 17.16 | 13.44 | 9.22   | 14.15 | 31.41  | 16.59 | 16.74  | 12.55 |
| SMil_00014774 | DAO           | DOXC | 0.80  | 0.12  | 0.20  | 0.33   | 0.13  | 0.31   | 0.16  | 0.18   | 0.14  |
| SMil_00016603 | DAO           | DOXC | 1.08  | 0.13  | 0.15  | 0.14   | 0.01  | 0.00   | 0.01  | 0.00   | 0.00  |
| SMil_00020998 | DAO           | DOXC | 3.57  | 0.81  | 0.19  | 0.10   | 0.02  | 0.00   | 0.00  | 0.03   | 0.05  |
| SMil_00019454 | DAO           | DOXC | 0.50  | 0.07  | 0.00  | 0.00   | 0.00  | 0.00   | 0.00  | 0.00   | 0.00  |
| SMil_00013746 | F3H           | DOXC | 16.95 | 5.65  | 9.87  | 74.06  | 65.58 | 156.30 | 73.71 | 314.14 | 43.32 |
| SMil_00022937 | F3H           | DOXC | 69.50 | 58.53 | 58.63 | 31.66  | 43.89 | 78.95  | 60.90 | 9.78   | 9.35  |
| SMil_00005410 | F3H           | DOXC | 12.97 | 16.55 | 14.78 | 18.09  | 15.72 | 12.51  | 12.88 | 6.15   | 23.75 |
| SMil_00008540 | F3H           | DOXC | 22.65 | 18.19 | 16.25 | 10.55  | 6.50  | 2.62   | 8.02  | 9.50   | 3.40  |
| SMil_00013745 | F3H           | DOXC | 39.67 | 3.56  | 1.27  | 27.81  | 21.64 | 8.04   | 5.66  | 11.78  | 3.34  |
| SMil_00028133 | F3H           | DOXC | 4.37  | 2.92  | 3.25  | 0.31   | 3.46  | 0.00   | 1.99  | 0.26   | 1.06  |
| SMil_00025718 | F3H           | DOXC | 2.72  | 0.15  | 0.06  | 93.37  | 21.03 | 28.03  | 1.07  | 95.73  | 7.44  |
| SMil_00014171 | F3H           | DOXC | 7.07  | 1.30  | 1.38  | 0.39   | 0.59  | 0.00   | 0.57  | 0.05   | 0.35  |
| SMil_00014618 | F3H           | DOXC | 0.00  | 0.00  | 0.00  | 20.91  | 0.03  | 0.00   | 0.20  | 0.04   | 0.00  |
| SMil_00008541 | F3H           | DOXC | 0.00  | 0.00  | 0.00  | 0.00   | 0.00  | 0.00   | 0.00  | 0.00   | 0.00  |
| SMil_00018601 | F3H           | DOXC | 0.00  | 0.00  | 0.00  | 3.38   | 0.00  | 0.00   | 0.00  | 0.00   | 0.02  |
| SMil_00022938 | F3H           | DOXC | 0.00  | 0.00  | 0.00  | 0.00   | 0.00  | 0.00   | 0.00  | 15.80  | 18.22 |
| SMil_00029434 | FLS/ANS       | DOXC | 0.00  | 0.00  | 0.00  | 570.96 | 0.50  | 0.00   | 2.08  | 0.33   | 0.00  |
| SMil_00003616 | FLS/ANS       | DOXC | 0.00  | 0.00  | 0.29  | 70.06  | 65.44 | 268.86 | 0.66  | 241.61 | 14.31 |
| SMil_00004980 | FLS/ANS       | DOXC | 0.24  | 0.00  | 0.04  | 2.91   | 0.30  | 0.32   | 0.20  | 2.54   | 0.83  |
| SMil_00026530 | GA20ox        | DOXC | 0.04  | 1.95  | 0.13  | 1.27   | 24.80 | 0.00   | 19.99 | 0.00   | 0.00  |
| SMil_00008090 | GA20ox        | DOXC | 1.50  | 1.94  | 2.27  | 45.86  | 6.58  | 2.03   | 2.28  | 0.67   | 0.38  |
| SMil_00026100 | GA20ox        | DOXC | 0.95  | 0.12  | 0.09  | 0.06   | 1.65  | 0.00   | 1.57  | 0.00   | 0.02  |

|               |        |      |       |       |       |        |       |       |       |       |       |
|---------------|--------|------|-------|-------|-------|--------|-------|-------|-------|-------|-------|
| SMil_00030201 | GA20ox | DOXC | 3.34  | 1.96  | 2.37  | 2.63   | 2.46  | 0.44  | 0.67  | 2.21  | 3.44  |
| SMil_00016302 | GA20ox | DOXC | 0.24  | 0.03  | 0.00  | 2.19   | 0.57  | 0.46  | 0.22  | 5.71  | 0.33  |
| SMil_00010684 | GA20ox | DOXC | 0.23  | 0.04  | 0.10  | 0.15   | 0.33  | 0.00  | 0.00  | 0.00  | 0.00  |
| SMil_00017774 | GA2ox  | DOXC | 8.37  | 14.85 | 15.37 | 25.92  | 12.49 | 5.47  | 39.93 | 8.09  | 0.51  |
| SMil_00022299 | GA2ox  | DOXC | 10.03 | 11.15 | 13.89 | 10.67  | 7.92  | 6.82  | 28.91 | 5.38  | 0.61  |
| SMil_00024988 | GA2ox  | DOXC | 2.03  | 1.85  | 4.21  | 106.42 | 12.53 | 11.07 | 19.15 | 17.67 | 30.98 |
| SMil_00004141 | GA2ox  | DOXC | 2.78  | 3.16  | 2.81  | 3.08   | 8.13  | 0.28  | 14.54 | 3.93  | 1.24  |
| SMil_00005648 | GA2ox  | DOXC | 0.02  | 0.12  | 0.02  | 190.12 | 5.64  | 1.58  | 8.20  | 0.00  | 0.09  |
| SMil_00024563 | GA2ox  | DOXC | 0.09  | 0.54  | 0.34  | 1.46   | 7.77  | 1.29  | 1.62  | 3.46  | 0.33  |
| SMil_00028460 | GA2ox  | DOXC | 12.76 | 2.89  | 0.74  | 0.00   | 0.05  | 0.31  | 0.87  | 0.25  | 0.06  |
| SMil_00016123 | GA2ox  | DOXC | 0.36  | 0.00  | 0.13  | 0.26   | 0.42  | 0.00  | 0.48  | 0.12  | 0.00  |
| SMil_00014304 | GA2ox  | DOXC | 0.00  | 0.00  | 0.06  | 0.03   | 0.04  | 1.38  | 0.23  | 2.85  | 0.30  |
| SMil_00020663 | GA2ox  | DOXC | 0.00  | 0.00  | 0.00  | 0.00   | 0.03  | 0.54  | 0.19  | 3.11  | 0.30  |
| SMil_00021366 | GA2ox  | DOXC | 0.14  | 0.00  | 0.04  | 4.00   | 12.25 | 6.89  | 0.07  | 30.77 | 13.05 |
| SMil_00014612 | GA2ox  | DOXC | 0.00  | 0.00  | 0.00  | 0.04   | 0.00  | 0.00  | 0.00  | 0.00  | 0.00  |
| SMil_00019079 | GA2ox  | DOXC | 0.00  | 0.00  | 0.00  | 0.00   | 0.00  | 0.00  | 0.00  | 0.16  | 0.13  |
| SMil_00013638 | GA3ox  | DOXC | 0.00  | 0.00  | 0.25  | 6.88   | 6.72  | 0.00  | 1.75  | 0.76  | 0.13  |
| SMil_00003886 | GA3ox  | DOXC | 5.83  | 2.94  | 3.42  | 1.16   | 0.00  | 0.00  | 0.41  | 0.20  | 0.13  |
| SMil_00024092 | H6H    | DOXC | 29.73 | 17.98 | 25.56 | 7.32   | 0.00  | 0.17  | 7.46  | 0.10  | 0.29  |
| SMil_00027988 | H6H    | DOXC | 3.22  | 3.44  | 0.70  | 0.31   | 0.13  | 0.00  | 0.50  | 0.03  | 0.39  |
| SMil_00027610 | H6H    | DOXC | 6.52  | 7.84  | 1.75  | 0.00   | 0.00  | 0.00  | 0.45  | 0.00  | 0.04  |
| SMil_00001764 | P4H    | DOXB | 77.07 | 58.74 | 53.39 | 41.30  | 63.39 | 58.63 | 40.01 | 59.01 | 51.78 |
| SMil_00013421 |        | DOXA | 2.41  | 1.82  | 1.53  | 7.52   | 3.86  | 0.33  | 31.46 | 1.01  | 1.58  |
| SMil_00001015 | P4H    | DOXB | 84.84 | 46.27 | 36.29 | 27.27  | 43.79 | 64.03 | 29.74 | 21.18 | 25.44 |
| SMil_00004726 | P4H    | DOXB | 32.33 | 28.55 | 25.51 | 50.98  | 43.14 | 16.69 | 23.68 | 27.92 | 39.97 |
| SMil_00018996 | P4H    | DOXB | 27.22 | 19.76 | 19.76 | 16.51  | 17.73 | 32.92 | 19.14 | 14.63 | 15.65 |

|               |         |              |        |       |       |       |        |       |        |       |       |
|---------------|---------|--------------|--------|-------|-------|-------|--------|-------|--------|-------|-------|
| SMil_00021498 |         | DOXA         | 3.25   | 8.85  | 7.12  | 47.49 | 28.31  | 36.81 | 18.91  | 45.47 | 11.42 |
| SMil_00000263 |         | Unclassified | 17.64  | 15.34 | 14.80 | 16.52 | 14.81  | 10.38 | 12.30  | 8.61  | 10.64 |
| SMil_00021036 | P4H     | DOXB         | 30.83  | 26.30 | 33.99 | 13.84 | 18.96  | 22.58 | 10.80  | 6.15  | 4.54  |
| SMil_00006860 | P4H     | DOXB         | 12.12  | 13.70 | 10.85 | 7.94  | 8.01   | 4.30  | 8.12   | 2.14  | 5.12  |
| SMil_00001058 |         | DOXA         | 7.31   | 6.11  | 6.37  | 4.90  | 4.41   | 1.82  | 6.89   | 1.91  | 2.04  |
| SMil_00011070 |         | Unclassified | 10.03  | 7.86  | 7.33  | 5.90  | 2.13   | 3.60  | 3.72   | 1.29  | 2.67  |
| SMil_00006313 |         | Unclassified | 3.58   | 3.38  | 4.45  | 4.38  | 5.83   | 7.24  | 2.92   | 2.89  | 3.87  |
| SMil_00013255 | P4H     | DOXB         | 5.79   | 4.38  | 4.68  | 3.53  | 3.07   | 2.68  | 2.47   | 1.32  | 1.28  |
| SMil_00023889 | P4H     | DOXB         | 0.00   | 0.00  | 0.01  | 0.01  | 0.53   | 0.25  | 0.13   | 0.05  | 0.00  |
| SMil_00013059 | S3H     | DOXC         | 1.73   | 5.07  | 0.57  | 6.07  | 31.46  | 0.00  | 20.04  | 0.56  | 0.17  |
| SMil_00027265 | S3H     | DOXC         | 11.65  | 13.36 | 7.14  | 1.96  | 2.62   | 2.18  | 2.33   | 1.05  | 4.12  |
| SMil_00020342 | Unknown | DOXC         | 109.93 | 69.27 | 19.83 | 15.58 | 297.68 | 0.96  | 146.22 | 9.13  | 21.44 |
| SMil_00021188 | Unknown | DOXC         | 0.15   | 0.13  | 14.54 | 55.69 | 109.70 | 18.64 | 40.98  | 23.90 | 4.41  |
| SMil_00009012 | Unknown | DOXC         | 3.18   | 0.60  | 0.50  | 16.18 | 16.59  | 5.36  | 39.26  | 0.03  | 0.31  |
| SMil_00025213 | Unknown | DOXC         | 0.45   | 0.12  | 0.06  | 0.17  | 14.16  | 0.00  | 29.19  | 0.03  | 3.92  |
| SMil_00021185 | Unknown | DOXC         | 24.86  | 24.24 | 21.97 | 72.98 | 47.18  | 6.79  | 23.53  | 29.89 | 13.76 |
| SMil_00018122 | Unknown | DOXC         | 0.06   | 0.04  | 0.50  | 49.92 | 37.22  | 19.89 | 8.72   | 34.06 | 4.17  |
| SMil_00013688 | Unknown | DOXC         | 21.13  | 17.71 | 19.66 | 14.21 | 9.32   | 12.23 | 8.31   | 5.28  | 7.46  |
| SMil_00021184 | Unknown | DOXC         | 0.82   | 0.50  | 1.53  | 7.99  | 16.69  | 1.37  | 4.95   | 2.80  | 2.08  |
| SMil_00019234 | Unknown | DOXC         | 0.29   | 0.18  | 0.03  | 0.00  | 1.49   | 0.00  | 3.40   | 0.00  | 0.10  |
| SMil_00019233 | Unknown | DOXC         | 0.20   | 0.15  | 0.12  | 0.02  | 0.07   | 0.00  | 2.31   | 0.02  | 0.02  |
| SMil_00018452 | Unknown | DOXC         | 7.28   | 8.47  | 5.57  | 0.70  | 1.24   | 0.36  | 1.67   | 2.76  | 0.90  |
| SMil_00018124 | Unknown | DOXC         | 9.41   | 4.10  | 3.01  | 28.31 | 0.04   | 0.00  | 0.23   | 0.00  | 31.42 |
| SMil_00022446 | Unknown | DOXC         | 0.00   | 0.02  | 0.00  | 0.00  | 0.11   | 0.00  | 0.18   | 0.00  | 0.00  |
| SMil_00018123 | Unknown | DOXC         | 17.80  | 3.00  | 0.00  | 0.08  | 0.02   | 0.00  | 0.12   | 0.00  | 0.00  |
| SMil_00019235 | Unknown | DOXC         | 0.00   | 0.00  | 0.00  | 0.00  | 0.05   | 0.00  | 0.10   | 0.00  | 0.00  |

|               |         |      |      |      |      |      |      |      |      |      |      |
|---------------|---------|------|------|------|------|------|------|------|------|------|------|
| SMil_00030383 | Unknown | DOXC | 0.09 | 0.10 | 0.13 | 1.80 | 1.73 | 9.52 | 0.03 | 3.99 | 1.51 |
| SMil_00007843 | Unknown | DOXC | 0.02 | 0.00 | 0.00 | 0.00 | 0.00 | 0.00 | 0.00 | 0.15 | 0.00 |
| SMil_00009013 | Unknown | DOXC | 0.00 | 0.00 | 0.00 | 0.00 | 0.00 | 0.00 | 0.00 | 0.43 | 0.30 |
| SMil_00013222 | Unknown | DOXC | 0.00 | 0.00 | 0.00 | 0.04 | 0.00 | 0.15 | 0.00 | 0.18 | 0.57 |

---

Supplementary Table5. Candidate 2OGDs related to tanshinone biosynthesis in *S. miltiorrhiza*.

| Gene_IDs             | Gene_name | Clades        | Classes | Periderm     | Phloem       | xylem       | Flower      | Stem          | Leaf        | Root          | MeJA-0      | MeJA-12      |
|----------------------|-----------|---------------|---------|--------------|--------------|-------------|-------------|---------------|-------------|---------------|-------------|--------------|
| SMil_00024282        | 2OGD-1    | CODM/NCS      | DOXC    | 135.18       | 55.22        | 19.65       | 3.55        | 4.23          | 0.39        | 2.55          | 0.29        | 5.19         |
| SMil_00020342        | 2OGD-2    | Unknown       | DOXC    | 109.93       | 69.27        | 19.83       | 15.58       | 297.68        | 0.96        | 146.22        | 9.13        | 21.44        |
| SMil_00018668        | 2OGD-3    | D4H/GSLOH/BX6 | DOXC    | 73.56        | 23.72        | 0.39        | 22.87       | 33.40         | 2.62        | 52.94         | 0.00        | 0.03         |
| SMil_00018100        | 2OGD-4    | D4H/GSLOH/BX6 | DOXC    | 50.15        | 9.09         | 0.66        | 0.02        | 0.02          | 0.00        | 1.23          | 0.00        | 0.00         |
| <b>SMil_00012032</b> | 2OGD-5    | D4H/GSLOH/BX6 | DOXC    | <b>45.90</b> | <b>24.78</b> | <b>8.29</b> | <b>5.37</b> | <b>114.20</b> | <b>0.81</b> | <b>270.35</b> | <b>5.60</b> | <b>79.07</b> |
| SMil_00029331        | 2OGD-6    | D4H/GSLOH/BX6 | DOXC    | 41.15        | 9.12         | 3.67        | 4.51        | 14.41         | 3.65        | 13.68         | 3.41        | 26.07        |
| SMil_00013745        | 2OGD-7    | F3H           | DOXC    | 39.67        | 3.56         | 1.27        | 27.81       | 21.64         | 8.04        | 5.66          | 11.78       | 3.34         |
| SMil_00016110        | 2OGD-8    | D4H/GSLOH/BX6 | DOXC    | 17.93        | 5.92         | 3.64        | 25.01       | 79.04         | 35.64       | 11.98         | 60.41       | 482.59       |
| SMil_00018123        | 2OGD-9    | Unknown       | DOXC    | 17.80        | 3.00         | 0.00        | 0.08        | 0.02          | 0.00        | 0.12          | 0.00        | 0.00         |
| SMil_00029330        | 2OGD-10   | D4H/GSLOH/BX6 | DOXC    | 16.04        | 1.74         | 0.13        | 4.13        | 13.12         | 4.81        | 3.80          | 8.93        | 25.21        |
| SMil_00000574        | 2OGD-11   | AOP           | DOXC    | 13.17        | 4.86         | 2.38        | 1.35        | 1.69          | 11.17       | 0.53          | 5.66        | 0.07         |
| SMil_00028460        | 2OGD-12   | GA2ox         | DOXC    | 12.76        | 2.89         | 0.74        | 0.00        | 0.05          | 0.31        | 0.87          | 0.25        | 0.06         |
| SMil_00022077        | 2OGD-13   | ACO           | DOXC    | 10.04        | 4.58         | 1.92        | 20.42       | 51.19         | 1.09        | 44.51         | 3.00        | 182.02       |



Supplementary Table6. Different tanshinone metabolites analysed from 2OGD5-silencing lines and control lines.

| Compound name  | RT(mi<br>n) | M+H | MS/MS                               | Molecular<br>formula                           | Molecular<br>weight | CAS                     | PK1      | PK2      | PK3      | Average PK | Standard<br>PK | 2OGD-5   | Differenc<br>e ratio<br>(2OGD5/ |
|----------------|-------------|-----|-------------------------------------|------------------------------------------------|---------------------|-------------------------|----------|----------|----------|------------|----------------|----------|---------------------------------|
| Salvisyrianone | 9.07        | 313 | 313,295,277,<br>267,253,241,<br>227 | C <sub>20</sub> H <sub>24</sub> O <sub>3</sub> | 312                 | <b>250691-<br/>57-7</b> | 6.77E+06 | 5.71E+06 | 7.69E+06 | 6.72E+06   | 9.91E+05       | 9.83E+06 | 1.46                            |
| Cryptojaponol  | 7.24        | 331 | 331,313,303,<br>301,295,285,<br>283 | C <sub>21</sub> H <sub>30</sub> O <sub>3</sub> | 330                 | -                       | 1.05E+06 | 8.65E+05 | 1.06E+06 | 9.92E+05   | 1.10E+05       | 1.24E+06 | 1.25                            |
| Trijuganone B  | 8.38        | 281 | 281,263,248,<br>235,220,192         | C <sub>18</sub> H <sub>16</sub> O <sub>3</sub> | 280                 | <b>126979-<br/>84-8</b> | 2.65E+05 | 2.38E+05 | 5.70E+05 | 3.58E+05   | 1.84E+05       | 3.91E+05 | 1.09                            |

|                                                    |      |     |                                         |          |     |                        |          |          |          |          |          |          |      |
|----------------------------------------------------|------|-----|-----------------------------------------|----------|-----|------------------------|----------|----------|----------|----------|----------|----------|------|
| Danshenxinkun<br>A                                 | 6.71 | 297 | 297,279,261,<br>251,233,205,<br>190     | C18H16O4 | 296 | <b>65907-<br/>75-7</b> | 2.17E+06 | 3.12E+06 | 2.59E+06 | 2.63E+06 | 4.76E+05 | 2.86E+06 | 1.09 |
| 3 $\alpha$ -<br>Hydroxymethyl<br>enetanshinquinone | 5.66 | 295 | 295,277,267,<br>251,249,221             | C18H14O4 | 294 | <b>83145-<br/>47-5</b> | 9.00E+05 | 7.09E+05 | 6.14E+05 | 7.41E+05 | 1.46E+05 | 7.79E+05 | 1.05 |
| 1, 2-<br>Didehydrotanshinone V                     | 6.13 | 313 | 313,295,280,<br>277,267,253,<br>249,225 | C19H20O4 | 312 | -                      | 9.94E+05 | 9.35E+05 | 7.45E+05 | 8.91E+05 | 1.30E+05 | 8.41E+05 | 0.94 |

|                       |     |     |                                     |          |     |                    |          |          |          |          |          |          |      |
|-----------------------|-----|-----|-------------------------------------|----------|-----|--------------------|----------|----------|----------|----------|----------|----------|------|
| Tanshinol B           | 7.4 | 297 | 297,279,261,<br>233,218,205,<br>190 | C18H16O4 | 296 | <b>189290-30-0</b> | 1.33E+07 | 1.04E+07 | 1.00E+07 | 1.12E+07 | 1.80E+06 | 1.02E+07 | 0.91 |
| Hydroxytanshinone IIA | 6.4 | 311 | 311,293,278,<br>247,219,204,<br>191 | C19H18O4 | 310 | <b>18887-18-8</b>  | 2.76E+05 | 4.74E+05 | 3.24E+05 | 3.58E+05 | 1.03E+05 | 3.13E+05 | 0.87 |
| Methylenetanshinone   | 7.4 | 279 | 279,261,233,<br>205,201,190,<br>149 | C18H14O3 | 278 | <b>67656-29-5</b>  | 2.18E+05 | 2.87E+05 | 2.83E+05 | 2.63E+05 | 3.87E+04 | 2.24E+05 | 0.85 |

|                |      |     |                                     |          |     |                         |          |          |          |          |          |          |      |
|----------------|------|-----|-------------------------------------|----------|-----|-------------------------|----------|----------|----------|----------|----------|----------|------|
| Tanshinone IIB | 7.15 | 311 | 311,293,278,<br>275,265,251,<br>247 | C19H18O4 | 310 | <b>17397-<br/>93-2</b>  | 2.56E+06 | 3.45E+06 | 2.76E+06 | 2.92E+06 | 4.67E+05 | 2.35E+06 | 0.80 |
| trijuganone C  | 7.53 | 341 | 341,281,263,<br>235                 | C20H20O5 | 340 | <b>135247-<br/>94-8</b> | 3.17E+06 | 2.54E+06 | 2.86E+06 | 2.86E+06 | 3.15E+05 | 2.29E+06 | 0.80 |
| Tanshinone I   | 8.91 | 277 | 277,259,235,<br>249,221,193,<br>178 | C18H12O3 | 276 | <b>568-73-<br/>0</b>    | 1.11E+07 | 1.42E+07 | 1.09E+07 | 1.21E+07 | 1.85E+06 | 9.64E+06 | 0.80 |

|                                         |      |     |                                                                                    |     |                         |          |          |          |          |          |          |      |
|-----------------------------------------|------|-----|------------------------------------------------------------------------------------|-----|-------------------------|----------|----------|----------|----------|----------|----------|------|
| 1, 2-<br>Didehydrotanshi<br>none<br>IIA | 9.63 | 293 | 279,261,233,<br>218,205,190, C <sub>19</sub> H <sub>16</sub> O <sub>3</sub><br>169 | 292 | <b>119963-<br/>50-7</b> | 1.62E+06 | 2.12E+06 | 1.66E+06 | 1.80E+06 | 2.78E+05 | 1.33E+06 | 0.74 |
|-----------------------------------------|------|-----|------------------------------------------------------------------------------------|-----|-------------------------|----------|----------|----------|----------|----------|----------|------|

|                                    |      |     |                                                                                    |     |                        |          |          |          |          |          |          |      |
|------------------------------------|------|-----|------------------------------------------------------------------------------------|-----|------------------------|----------|----------|----------|----------|----------|----------|------|
| 15, 16-<br>Dihydrotanshin<br>one I | 8.08 | 279 | 279,261,233,<br>218,205,190, C <sub>18</sub> H <sub>14</sub> O <sub>3</sub><br>169 | 278 | <b>87205-<br/>99-0</b> | 1.16E+07 | 1.20E+07 | 1.20E+07 | 1.19E+07 | 2.31E+05 | 8.62E+06 | 0.73 |
|------------------------------------|------|-----|------------------------------------------------------------------------------------|-----|------------------------|----------|----------|----------|----------|----------|----------|------|

|                        |      |     |                                                                                    |     |                         |          |          |          |          |          |          |      |
|------------------------|------|-----|------------------------------------------------------------------------------------|-----|-------------------------|----------|----------|----------|----------|----------|----------|------|
| Methyltanshino<br>nate | 8.42 | 339 | 339,279,261,<br>233,205,190, C <sub>20</sub> H <sub>18</sub> O <sub>5</sub><br>149 | 338 | <b>135355-<br/>72-5</b> | 6.70E+06 | 7.88E+06 | 7.17E+06 | 7.25E+06 | 5.94E+05 | 4.77E+06 | 0.66 |
|------------------------|------|-----|------------------------------------------------------------------------------------|-----|-------------------------|----------|----------|----------|----------|----------|----------|------|

|                             |      |     |                                         |          |     |                        |          |          |          |          |          |          |      |
|-----------------------------|------|-----|-----------------------------------------|----------|-----|------------------------|----------|----------|----------|----------|----------|----------|------|
| 1R-<br>hydroxymiltiron<br>e | 7.77 | 299 | 299,281,266,<br>263,253,221,<br>193,178 | C19H22O3 | 298 | -                      | 2.44E+05 | 1.54E+05 | 1.65E+05 | 1.88E+05 | 4.91E+04 | 1.06E+05 | 0.56 |
| Cryptotanshinon<br>e        | 9.01 | 297 | 297,282,279,<br>267,254,221,<br>193     | C19H20O3 | 296 | <b>35825-<br/>57-1</b> | 2.01E+07 | 1.38E+07 | 1.58E+07 | 1.66E+07 | 3.22E+06 | 9.26E+06 | 0.56 |
| Tanshinone IIA              | 9.89 | 295 | 295,277,267,<br>253,249,234,<br>221,206 | C19H18O3 | 294 | <b>568-72-<br/>9</b>   | 2.71E+06 | 2.99E+06 | 2.71E+06 | 2.80E+06 | 1.62E+05 | 1.56E+06 | 0.56 |

|                           |      |     |                                         |          |     |                    |          |          |          |          |          |          |      |
|---------------------------|------|-----|-----------------------------------------|----------|-----|--------------------|----------|----------|----------|----------|----------|----------|------|
| Sibiriquinone A           | 7.1  | 281 | 281,263,253,<br>235,207,179             | C19H20O2 | 280 | <b>723300-08-1</b> | 6.91E+04 | 6.78E+04 | 5.71E+04 | 6.47E+04 | 6.59E+03 | 3.51E+04 | 0.54 |
| Tanshinone VI             | 4.7  | 297 | 297,279,261,<br>251,233,205,<br>190     | C18H16O4 | 296 | <b>121064-74-2</b> | 5.80E+05 | 6.06E+05 | 5.29E+05 | 5.72E+05 | 3.92E+04 | 3.08E+05 | 0.54 |
| 1-Ketoisocryptotanshinone | 7.99 | 311 | 311,293,283,<br>275,265,255,<br>227,221 | C19H18O4 | 310 | -                  | 8.98E+04 | 8.07E+04 | 5.02E+04 | 7.36E+04 | 2.07E+04 | 3.18E+04 | 0.43 |

|               |      |     |                             |          |     |                        |          |          |          |          |          |          |      |
|---------------|------|-----|-----------------------------|----------|-----|------------------------|----------|----------|----------|----------|----------|----------|------|
| Tanshindiol B | 7.04 | 313 | 313,295,277,<br>266,249,235 | C18H16O5 | 312 | <b>97465-<br/>70-8</b> | 1.04E+06 | 7.53E+05 | 6.23E+05 | 8.05E+05 | 2.13E+05 | 3.36E+05 | 0.42 |
|---------------|------|-----|-----------------------------|----------|-----|------------------------|----------|----------|----------|----------|----------|----------|------|

|               |      |     |                             |          |     |                        |          |          |          |          |          |          |      |
|---------------|------|-----|-----------------------------|----------|-----|------------------------|----------|----------|----------|----------|----------|----------|------|
| Tanshindiol C | 7.14 | 313 | 313,295,277,<br>266,249,235 | C18H16O5 | 312 | <b>97465-<br/>71-9</b> | 4.91E+05 | 5.32E+05 | 4.33E+05 | 4.85E+05 | 4.97E+04 | 1.83E+05 | 0.38 |
|---------------|------|-----|-----------------------------|----------|-----|------------------------|----------|----------|----------|----------|----------|----------|------|

|           |       |     |                                     |          |     |                        |          |          |          |          |          |          |      |
|-----------|-------|-----|-------------------------------------|----------|-----|------------------------|----------|----------|----------|----------|----------|----------|------|
| Miltirone | 10.09 | 283 | 283,265,240,<br>223,208,195,<br>153 | C19H22O2 | 282 | <b>27210-<br/>57-7</b> | 3.19E+06 | 1.28E+06 | 1.80E+06 | 2.09E+06 | 9.87E+05 | 3.39E+05 | 0.16 |
|-----------|-------|-----|-------------------------------------|----------|-----|------------------------|----------|----------|----------|----------|----------|----------|------|

---
